1

2

3

4 Deformable image registration for automatic muscle segmentation  
5 and the generation of augmented imaging datasets

6

7 William H. Henson<sup>1,2\*</sup>, Claudia Mazzá<sup>1,2</sup>, Enrico Dall'Ara<sup>2,3</sup>

8

9

10

11 *<sup>1</sup>Department of Mechanical Engineering, The University of Sheffield, Sheffield, United*  
12 *Kingdom*

13 *<sup>2</sup>INSIGNEO institute for in silico medicine, The University of Sheffield, Sheffield, United*  
14 *Kingdom*

15 *<sup>3</sup>Department of Oncology and Metabolism, The University of Sheffield, Sheffield, United*  
16 *Kingdom*

17

18

19 \* [whhenson1@sheffield.ac.uk](mailto:whhenson1@sheffield.ac.uk)

20

## 21 [Abstract](#)

22 Muscle segmentation is a process relied upon to gather medical image-based muscle  
23 characterisation, useful in directly assessing muscle volume and geometry, that can be used  
24 as inputs to musculoskeletal modelling pipelines. Manual or semi-automatic techniques are  
25 typically employed to segment the muscles and quantify their properties, but they require  
26 significant manual labour and incur operator repeatability issues. In this study an automatic  
27 process is presented, aiming to segment all lower limb muscles from Magnetic Resonance  
28 (MR) imaging data simultaneously using three-dimensional (3D) deformable image  
29 registration. Twenty-three of the major lower limb skeletal muscles were segmented from  
30 five subjects, with an average Dice similarity coefficient of 0.72, and average absolute relative  
31 volume error of 12.7% (average relative volume error of -2.2%) considering the optimal  
32 subject combinations. Segmented MR imaging datasets of the lower limb are not widely  
33 available in the literature, limiting the potential of new, probabilistic methods such as deep  
34 learning to be used in the context of muscle segmentation. In this work, Non-linear  
35 deformable image registration is used to generate 69 manually checked, segmented, 3D,  
36 artificial datasets, allowing access for future studies to use these new methods, with a large  
37 amount of reliable reference data.

## 38 1. Introduction

39 Muscles enable all elected movements of the human body [1]. Relationships between  
40 structural muscle characteristics such as muscle volume, geometry and length, or level of fatty  
41 infiltration and the functional capacity of individual muscles have long been established  
42 [2,3,4]. Specifically, muscle volume and geometry are indicative of the maximal force that a  
43 muscle is capable of outputting [3,5,6] and fat infiltration within muscle tissue, known as  
44 myosteatosis, reduces the saturation of contractile tissue, hindering the force generating  
45 capacity of a muscle [3,4]. Longitudinal changes in these structural characteristics are  
46 recognised as components of both aging [7,8,9] and the development of musculoskeletal  
47 (MSK) and neuromusculoskeletal disorders [10,11,12,13,14]. Through medical imaging  
48 analysis, structural muscle characteristics are measurable *in vivo* in a process named muscle  
49 segmentation [10,11].

50 Both Computed Tomography (CT) and Magnetic Resonance (MR) imaging, have been  
51 used to non-invasively gather quantitative structural muscle characteristics such as volume  
52 [15,16] or geometric shape [15,16,17]. The structural characteristics of the skeletal muscles  
53 within the lower limb are of particular interest, due to their capacity to enable locomotion  
54 [1,15,19]. As the lower limbs are such a large area of the body, many studies prefer MR  
55 imaging over CT, to limit ionising radiation exposure of subjects enrolled in studies or of  
56 patients in future potential clinical applications [15, 19]. The current approach used within  
57 the literature to gather these structural muscle characteristics from MR images is manual  
58 segmentation, during which the operator defines in each slice of the MR image (or in a  
59 subgroup of them) the contour of each muscle [15,19,20]. There are two main limitations of  
60 manual segmentation: the required operator input time and operator dependency issues of  
61 the outputs [5,6,15,18]. It is generally accepted that there are 35 individual lower limb  
62 muscles, not including those in the feet (some of these muscles can be separated into  
63 different branches or sub-muscles [15,22,23]), which must be segmented from (in the order  
64 of) hundreds of images, incurring a high processing time [15,20,21]. Recent advancements in  
65 computer vision (interpolation between segmented slices) and hardware (trackpads) have  
66 brought operator interaction time down to approximately 10 hours to segment all muscles  
67 within one lower limb [15,20,21]. Not only is this interaction time excessive, but operators  
68 must undergo training to achieve repeatable segmentation results from an intra-operator  
69 standpoint ( $\pm 10\%$  volume is typically acceptable) [15]. Regardless of training, as suggested,  
70 there are significant inter-operator dependency issues noted within the literature, which have  
71 been shown to misinterpret muscle volume by up to 50% (for example, the peroneus brevis  
72 and longus [15]), depending on the muscle of interest and study cohort [15,21,24]. These

73 limitations of manual segmentation prevent the utilisation of muscle segmentation as a  
74 technique to inform large-scale quantitative investigations into muscle characteristics.

75         Many different automatic segmentation methods have been investigated within the  
76 literature in recent years to replace the manual approach [21,24,25,27]. Statistical shape  
77 modelling (SSM) entails the generation of an average atlas geometry, which can be scaled or  
78 deformed to fit individuals. It has been used to achieve a good agreement of automatically  
79 and manually generated segmentations of single muscles from MR images, such as the  
80 quadratus lumborum within the lower back by Engstrom et al. [25] where the Dice similarity  
81 coefficient (DSC), a volumetric and spatial measure of agreement, achieved was  $0.86 \pm 0.08$   
82 (mean  $\pm$  standard deviation). This technique was shown to be well suited to the automatic  
83 segmentation of this muscle given its non-complex, truncated cone-like shape, but has not  
84 been explored in the segmentation of many individual muscles simultaneously. The large  
85 variability of muscle volume and geometry within the lower limb skeletal muscles between  
86 subjects, even within cohorts with similar anthropometric characteristics, limits the  
87 application of SSM to segment these muscles [15,29,30,31]. Image registration has also been  
88 explored within the literature to perform muscle segmentation. Simplistic applications, such  
89 as two-dimensional (2D) deformable image registration between subsequent MR imaging  
90 slices within subjects has been used to propagate segmentations of individual slices into  
91 partial sections of 3D muscle geometry using only a few manually segmented slices, with  
92 encouraging results (DSC  $\approx 0.91$ ) [32]. 3D image registration has been used within  
93 longitudinal studies to populate MR images with partial segmentations of a small number of  
94 muscles to good effect, such as within the studies presented by Le Troter et al. [33] and  
95 Fontana et al. [34]. Though this longitudinal approach provides insight into the change in  
96 muscle characteristics over time, multiple MR image sequences are required from individual  
97 subjects at two different timepoints and one dataset must be manually segmented. Within  
98 the literature, inter-subject registration aiming to segment the muscles within a new subject,  
99 referencing a previously segmented subject has not yet been fully explored to the best of the  
100 author's knowledge. An in-house image registration algorithm (Sheffield Image Registration  
101 Toolkit, ShIRT) has been used to segment both hard [43] and vascular [42,43] tissues with a  
102 high level of accuracy but has not yet been tested in the application of muscle segmentation.  
103 ShIRT performs deformable (non-linear) image registration, allowing high degrees of  
104 anatomical variability between inputted images to be addressed [41,42,43], and has the  
105 potential to automatically segment blocks of muscles or individual muscles given a fully  
106 segmented reference subject, but this is yet to be explored within the literature.

107           Other methods have been shown to be effective in the segmentation of muscles.  
108 Probabilistic machine learning methods such as deep learning have been used to  
109 automatically segment the 3D geometry of individual muscles from MR images taken from  
110 several different cohorts [20,21,24]. These methods employ Convolutional Neural Networks  
111 (CNNs) which learn patterns that identify important features from training data in order to  
112 apply these learned patterns to segment new, unseen data [20,21,24]. Notably, the methods  
113 recently proposed by Ni et al. [24], where all lower limb muscles within a cohort ( $n = 64$ ) of  
114 young healthy athletes were segmented with DSC comparable to that of the inter-operator  
115 dependence ( $DSC \approx 0.9$ ), and those proposed by Zhu et al. [21] where all muscles within the  
116 shank were segmented from a cohort ( $n = 20$ ) of children with cerebral palsy ( $DSC \approx 0.88$ ).  
117 Though the segmentation accuracy found within these studies is remarkable, these methods  
118 are not widely accessible due to the main limitation of current deep learning methods: the  
119 requirement of large training databases (minimum  $\sim 20$  segmented 3D images, the greater  
120 this number the more robust the method) [35]. Unfortunately, generating these segmented  
121 imaging datasets might not be well suited to MR imaging, given the associated high costs and  
122 manual processing time. Additionally, when used in medical image segmentation, deep  
123 learning generally has the major limitation of a significantly reduced performance when  
124 assessing imaging data taken from widely varying cohorts [35]. Data augmentation is a  
125 technique widely used in association with CNNs for the purpose of supplying greater amounts  
126 of training data and helping to generalise their application to image classification and  
127 segmentation tasks [36,37]. Within this context, image registration has been previously used  
128 to generate augmented images to facilitate the analysis of brain tumours [38] and skeletal  
129 deformities [39]. This suggests that, while not attempted before, similar approaches might be  
130 adopted for muscle segmentation.

131           The aim of this study is hence twofold. The first is to evaluate the accuracy of a method  
132 for automatic segmentation of individual skeletal muscles in the lower limb from MR imaging  
133 data using 3D deformable image registration. Secondly, the effectiveness of this approach in  
134 the generation of augmented datasets is explored.

135

## 136 [2. Methods](#)

### 137 [2.1. Subjects & imaging acquisition method](#)

138 Retrospectively available lower limb T1-weighted MR images from 11 post-menopausal  
139 women (mean (standard deviation): 69 (7) years old, 66.9 (7.7) kg, 159 (3) cm) were used for  
140 this study [15]. Images were collected using a Magnetom Avanto 1.5T scanner (Siemens,  
141 Erlangen Germany), with an echo time of 2.59 ms, repetition time of 7.64 ms, flip angle of 10  
142 degrees. The study was approved by the East of England – Cambridgeshire and Hertfordshire  
143 Research Ethics Committee and the Health Research Authority (16/EE/0049). The MR images  
144 were acquired in four sequences, capturing the hip, thigh, knee, and shank. To reduce  
145 scanning time while still providing detailed geometries of the joints for use within the original  
146 study, the joints were acquired with a higher resolution (pixel size 1.05 mm<sup>2</sup>, slice spacing  
147 3.00 mm) than the long bone sections (pixel size 1.15 mm<sup>2</sup>, slice spacing 5.00 mm). The  
148 sequences were stacked in MATLAB forming one continuous 3D image from hip to ankle,  
149 firstly by homogenising the resolution of each of the imaging sequences taken from the  
150 different sections to be 1.00x1.00x1.00 mm<sup>3</sup> through tri-linear interpolation (interp3,  
151 MATLAB 2006a). The fields of view of the images across the four sequences were equated by  
152 wrapping the images in blank data (greyscale value of 0), referencing the spatial metadata of  
153 the images to retain the relative subject position across the imaging sequences for each  
154 subject. The homogenised sequences were concatenated in the longitudinal direction,  
155 removing half of any overlapping volume from each section where the fields of view  
156 overlapped. Lastly, the images were cut in half in the frontal axis, isolating only the right limb.  
157 A sub-cohort of 5 of the 11 subjects was selected for automatic segmentation. The five  
158 subjects were chosen with the aim of creating a sub-cohort with a wide anatomical diversity,  
159 choosing the tallest and shortest [154.0 cm, 164.2 cm], the subjects with the lowest and  
160 highest Body Mass Index (BMI, kg/m<sup>2</sup>) [21.2, 32.1], and the youngest and oldest participants  
161 [59, 83]. Each subject was used as both a target and a reference for the image registration  
162 algorithm, creating 20 subject pairings for the sub-cohort (inter-subject analysis). For  
163 comparison, the 5 subjects were registered with a procedure similar to the inter-subject  
164 analysis, using the opposing limb (left vs right) as the reference dataset for the registration  
165 (intra-subject analysis).

### 166 [2.2. Reference segmentations](#)

167 Each of the five subjects involved in this study were segmented manually, as presented  
168 by Montefiori et al. [15]. Within this database, the muscles for which the coefficient of

169 variation of the manual segmentations when repeated by the same operator on three  
 170 separate runs was greater than 10% were removed from the study, reducing the number of  
 171 muscles considered in this study from 35 to 23. Table 1 presents the range of volumes of the  
 172 23 muscles considered within this study within the cohort of 5 subjects. Their manual muscle  
 173 segmentations were used as the templates to populate imaging data of new subjects with  
 174 automatically generated muscle segmentations through image registration and to validate  
 175 them.

| Body segment       | Body segment                | Volumes                    |                            |
|--------------------|-----------------------------|----------------------------|----------------------------|
|                    |                             | Minimum (cm <sup>3</sup> ) | Maximum (cm <sup>3</sup> ) |
| Hip                | Adductor brevis             | 54.2                       | 67.1                       |
|                    | Adductor longus             | 59.7                       | 91.7                       |
|                    | Adductor magnus             | 282                        | 457                        |
|                    | Gluteus maximus             | 406                        | 654                        |
|                    | Iliacus                     | 81.8                       | 127                        |
|                    | Tensor fasciae latae        | 17.4                       | 57.9                       |
| Thigh              | Biceps femoris caput brevis | 31.5                       | 80.7                       |
|                    | Biceps femoris caput longum | 95.3                       | 128                        |
|                    | Gracilis                    | 37.6                       | 51.2                       |
|                    | Rectus femoris              | 94                         | 125                        |
|                    | Sartorius                   | 62.7                       | 105                        |
|                    | Semimembranosus             | 98.9                       | 154                        |
|                    | Semitendinosus              | 88.5                       | 101                        |
|                    | Vastus intermedius          | 214                        | 313                        |
|                    | Vastus lateralis            | 303                        | 351                        |
| Shank              | Vastus medialis             | 167                        | 277                        |
|                    | Gastrocnemius lateralis     | 78.2                       | 87                         |
|                    | Gastrocnemius medialis      | 123                        | 176                        |
|                    | Peroneus brevis             | 33.7                       | 41.6                       |
|                    | Peroneus longus             | 25.7                       | 59                         |
|                    | Soleus                      | 304                        | 406                        |
|                    | Tibialis anterior           | 74.4                       | 94.2                       |
| Tibialis posterior | 56.3                        | 90.6                       |                            |

176

177 **Table 1:**

178 *The range of volumes of the muscles included within the study for the 5 subjects considered. The muscles are separated into*  
 179 *three sections of the body (hip, thigh, and shank). The muscles considered are those that were segmented with an acceptable*

180 *level of repeatability [15]. Full description of muscle volumes within each subject expanded upon in supplementary material*  
181 *1.*

### 182 2.3. Image pre-processing

183 The MR images of each subject were pre-processed to homogenise the distribution of fat  
184 tissue within the scans and maintain the focus of registration to the muscles. For each 2D slice  
185 of imaging data (example slice shown in Fig. 1. A) within each subject, firstly, the air-skin  
186 boundary was located using a Canny edge detector [40]. The area within the skin boundary  
187 was filtered (Fig. 1. C), in response to a threshold established from the greyscale frequency  
188 intensity plots of the images, creating a mask that contained only the muscle tissue (Fig. 1.D).  
189 A layer of fat was wrapped around the muscle tissue (Fig. 1.E and 1.F) to emphasise the outer  
190 boundary of the muscle tissue. The depth of this layer of fat was made equal to the optimal  
191 nodal spacing (NS, a parameter of the registration [41], set to 5 mm, details in 2.4) as the  
192 registration operates optimally in the circumstance that the object being registered is of  
193 similar size to the NS [41]. There were two possible scenarios for the fat wrapping process: 1)  
194 the layer of fat within the image was greater than 5 mm, and 2) the layer of fat was less than  
195 5 mm. In the first scenario, the subject's fat tissue was wrapped around the muscle tissue at  
196 a depth of 5 mm. In the second scenario, artificial fat was wrapped around the body which  
197 was built in response to the greyscale frequency intensity peak that represents the fat. The  
198 pixels within 5 mm of the muscle tissue that lay outside the body were randomly assigned  
199 values using a uniform distribution with minimum and maximum equal to the mean  $\pm$   
200 standard deviation of the frequency intensity peak representing the fat.

#### 201 **Fig. 1:**

202 *The process of masking the fat tissue surrounding the muscles from the raw MR images (left) and wrapping in a homogenous*  
203 *layer of fat for two images taken from different subjects (right). The subject along the top row (right) had a fat layer less than*  
204 *5 mm thick and was wrapped with artificial fat, where the subject along the bottom row had a depth that was sufficient.*

### 205 2.4. Segmentation

206 Following pre-processing, subject imaging datasets were registered using ShIRT [41]. In the  
207 registration process, displacement functions were computed that map each pixel in a  
208 reference image to a corresponding pixel in the target image. ShIRT solves displacement  
209 equations at nodes of an isotropic hexahedral grid overlapped to the fixed and moved images,  
210 with distance between the nodes equal to NS. The optimal NS for this registration task was  
211 found through a sensitivity analysis (see supplementary material 2). Throughout the  
212 registration process the optimal nodal displacements are smoothed in response to a  
213 smoothing coefficient, optimised in each registration to solve the registration problem [41]



214 (this was verified to be indeed optimal for this application, see sensitivity analysis in  
215 supplementary material 2). The 3D displacement field is calculated using tri-linear  
216 interpolated displacements between the nodes of the grid. The registered image was  
217 generated after applying the transformation to the reference image and using tri-linear  
218 interpolation. Similarly, the automatic segmentation of the muscles within the target subject  
219 was calculated applying the transformation to the manual segmentations of the reference  
220 subject (Fig. 2).

221 To gauge the accuracy of the resulting segmentations, the registration and  
222 segmentation pipeline was used to segment the right limbs of the 5 subjects using the  
223 opposing limb as the reference input. The muscles within opposing limbs have been proven  
224 to be anatomically similar but distinct in both volume and geometry [15]. For these reasons,  
225 using the opposing limb in the segmentation pipeline should provide the best possible  
226 reference for the segmentation of the muscles within each of the 5 subjects.

## 227 **Fig. 2:**

228 *The image registration process, shown for one 2D slice of imaging data (location within imaging sequences highlighted with*  
229 *a black line). Segmentation pipeline: the target and reference subject were pre-processed, homogenizing the fat layer, and*  
230 *registered in ShIRT. The map found through registration was applied to the manual segmentation contours of the reference*  
231 *subject (shown in green), resulting in an automatic segmentation of the target subject (shown in blue). Data augmentation*  
232 *pipeline: The combined MR imaging sequences are registered in ShIRT. The map outputted from the registration was used to*  
233 *deform the reference subject's 3D imaging data and reference manual segmentations, resulting in a fully segmented,*  
234 *augmented 3D image. The augmented images are shown with each muscle taking a different greyscale value (visualised in*  
235 *blue image channel).*

## 236 2.5. Segmentation validation

237 The reference registered image and the target image were overlapped to assess the quality  
238 of the registration. The two images were visualised simultaneously, with the registered and  
239 target images shown in green and red, respectively. Well registered images appear yellow  
240 with very few green or red flecks. Fig. 3 presents three example registration results, where  
241 the quality of registration increases from left to right.

242 Three complementary quantitative metrics were used to test the accuracy of the  
243 automatic segmentation protocol. The relative volume error (RVE) was calculated following  
244 equation 1 for each muscle in each subject. Additionally, the total volume error (TVE) between  
245 the reference and automatically segmented muscles was calculated as the error between the  
246 sum of all muscle volumes, shown in equation 1.

$$RVE_{i,j} = 100 \times \frac{V_{A_{i,j}} - V_{M_{i,j}}}{V_{M_{i,j}}}, \quad TVE_j = 100 \times \frac{\sum_{i=1}^N |V_{A_{i,j}} - V_{M_{i,j}}|}{\sum_{i=1}^N V_{M_{i,j}}}$$

(1)

Where  $V_{A_{i,j}}$  and  $V_{M_{i,j}}$  are the volumes of the automatic muscle segmentation and ground truth (manual) segmentations, respectively.

The Dice similarity coefficient (DSC) [45] was used to assess the accuracy of segmentation considering both volume and geometry, through comparison with the ground truth segmentation. The DSC varies between 0 and 1, with a value of 1 signifying that the proposed segmentation and ground truth are identical. The DSC was calculated (Equation 2) for each muscle (i) in each subject (j), where  $A_{i,j}$  and  $M_{i,j}$  represent the automatic muscle segmentation and the ground truth segmentation, respectively.

$$DSC_{i,j} = \frac{2(A_{i,j} \cap M_{i,j})}{|A_{i,j}| \cup |M_{i,j}|}$$

(2)

Finally, the Hausdorff distance (HD) [46] between the automatic and reference muscle segmentations was calculated for each muscle in each subject, following equation 3, where  $a_{i,j}$  is an element of  $A_{i,j}$ ,  $m_{i,j}$  is an element of  $M_{i,j}$ , and  $d$  is the magnitude of the minimum distance between  $a_{i,j}$  or  $m_{i,j}$  and the nearest neighbouring point within  $M_{i,j}$  or  $A_{i,j}$ , respectively. For each subject the HD was calculated as the maximum among the minimum distances between the automatic and ground truth segmentations.

$$HD(A_{i,j}, M_{i,j}) = \max \{ (d(A_{i,j}, m_{i,j})), (d(a_{i,j}, M_{i,j})) \}$$

(3)

**Fig. 3:**

*Registration results of images taken from the shank. The registration quality is visualised within these plots with poor, moderate, and flawless registrations shown in a, b, and c, respectively. Yellow colour represents well registered regions.*

## 2.6. Generation of augmented data

The deformable image registration algorithm was used to generate segmented augmented MR imaging data, available for download within supplementary material 3 The stacked MR imaging data from the right limb of the 11 participants were registered to each of the other

274 subjects in the cohort, giving 110 combinations. No pre-processing was applied. The  
275 displacement vector field outputted from ShIRT (Fig. 2) was used to deform both the MR  
276 imaging sequence and the manual muscle segmentations of the reference subject. The output  
277 of each of these processes was a fully segmented 3D image that was dissimilar to both the  
278 reference subject and the target subject (Fig. 2). A four-point criterion was used for checking  
279 both the images and the segmentations to ensure anatomical credibility of the augmented  
280 dataset: a) the boundaries of the long bones and the skin must be reasonably smooth and  
281 continuous; b) the positioning and orientation of the joints must be anatomically viable, with  
282 the bones fitting together realistically; c) the muscle segmentations should reflect the muscle  
283 structure; and d) the location of each of the muscles relative to one another must be realistic  
284 (e.g. the vastus lateralis must be lateral with respect to the vastus medialis). If any one of  
285 these criteria were not met, the augmented dataset was discarded. Out of the retained  
286 datasets, 15 chosen at random were retested by a different operator to confirm the specificity  
287 of the inclusion criteria. Finally, the available muscle volumes were compared from within the  
288 augmented and original databases. The mean volume within each database was computed  
289 for each of the 23 muscles considered. The difference between the volume of each muscle  
290 within the database and the average was then calculated, and this value was normalised  
291 against the mean volume. The resulting values were percentages representing the  
292 distribution of available muscle volumes within each database, which after normalisation,  
293 could be compared.

## 294 3. Results

### 295 3.1. Segmentation results

296 A visualisation of an example registration and of the results of one segmentation are  
297 highlighted in Fig. 4 for images taken from the hip, thigh, and shank, respectively. While the  
298 deformable image registration has accurately identified the muscle tissue in the target subject  
299 in most cases (yellow), some regions were not correctly registered (red or green). The  
300 segmentation results reflect this, where the registration appears successful overall, and the  
301 automatic segmentations are geometrically very similar to the reference segmentations.  
302 There are areas within the automatic segmentations that do not reflect the reference  
303 segmentations, such as the gluteus maximus in the hip section, and the tibialis muscles within  
304 the shank section. The automatic segmentations within the thigh section mostly agree with  
305 the reference segmentations.

306 **Fig. 4:**

307 *Registration and segmentation results from the combination of subjects resulting in the median average DSC (subject 4 and*  
308 *2 as the target and reference, respectively). The registration inputs (top row) and outputs (bottom row) for these*  
309 *combinations of subjects are shown on the group of images on the left. The segmentation results are shown in the right three*  
310 *image groups, where the reference and automatic segmentations for the target subject are shown in blue and red*  
311 *respectively. The muscles that are not highlighted within the images, were found not to be segmented with an appropriate*  
312 *level of repeatability.*

### 313 3.1.1. Volume error

314 The TVE for the entire muscle body was  $8.2 \pm 5.1$  % (mean  $\pm$  standard deviation) across all  
315 subject combinations (Fig. 5). The mean RVE for the individual muscles was found to be below  
316 12.8% for all combinations and all upper quartiles were below 40% error. The best performing  
317 combination was subject 5 with 1 as the target and reference respectively, with among the  
318 smallest mean (-2.2%) and with the lowest quartiles (lower and upper quartiles of -10.5% and  
319 6.4%, respectively). The relative volume error was consistent across all muscles, with no  
320 correlation found between muscle volume and relative volume error ( $R^2=0.092$ , p-  
321 value=0.159); the muscles with the highest variability within this cohort (adductor brevis,  
322 rectus femoris) made up the outliers within the distributions of RVE. The mean RVE from the  
323 intra-subject (left vs right) analysis was 0.35%, (Fig. 5).

### 324 **Fig. 1:**

325 *Relative volume error (%) (top), Dice similarity coefficient (centre), and Hausdorff distances (mm) (bottom) found for each*  
326 *muscle in each subject, using the other subjects in the sub-cohort as the reference. The numbers above each of the boxplots*  
327 *denotes the reference subject pair for each target subject 1-5 used within the registration. The green area represents the*  
328 *acceptable level of RVE resulting from inter-operator dependence, prescribed by Montefiori et al. 2019 [15]. The grey dashed*  
329 *lines represent the mean values from the intra-subject analysis for comparison. The box and whisker plots show the mean,*  
330 *interquartile ranges, and ranges across the 23 muscles considered.*

### 331 3.1.2. Dice Similarity Coefficient

332 When looking at the segmentations of the five subjects obtained using the other four as  
333 reference subjects, very variable results were observed. The greatest average DSCs were  
334 those resulting from the segmentation of subjects 1,2, and 4, using subject 2, 1 and 1 as the  
335 reference subject, respectively. The mean DSCs found for these combinations of subjects  
336 were greater than 0.70, lower quartiles greater than 0.67, and with a wide spread of results  
337 ( $0.35 < DSC < 0.88$ ). Subjects 3 and 5 were segmented with a consistently lower DSC, with the  
338 average DSC considering all reference subjects found to be 0.61 and 0.60 respectively (0.69,  
339 0.69 and 0.67 for subject 1, 2, and 4, respectively). Additionally, one of these subjects was  
340 always the worst performing reference subject considering DSC when used to segment all  
341 target subjects, with the lowest average DSC. There was a weak correlation found between

342 muscle volume and the DSC of the automatic segmentations ( $R^2=0.332$ ,  $p$ -value=0.003). The  
343 average DSC found within the intra-subject analysis was 0.80 (Fig. 5).

### 344 3.1.3. Hausdorff distance

345 Overall, the average HD was typically between 15 mm and 30 mm, with the upper quartile  
346 being below 40 mm, other than the segmentations of subject 3 and 5 using subject 2 and 3 as  
347 references, respectively (Fig. 5). The spread of results was large, with Interquartile Ranges  
348 (IQR) being between 7 mm and 21 mm. There was no correlation found between the HD and  
349 the size of the muscle for which the HD was calculated ( $R^2=0.097$ ,  $p$ -value=0.089), the error  
350 was consistent across muscles of all sizes. The average HD found within the intra-subject  
351 analysis was 17.7 mm.

### 352 3.2. Augmented data

353 After initial checking by the author, 69 of the 110 generated augmented datasets passed the  
354 inclusion criteria. 15 datasets were rechecked by an expert in muscle segmentation and all 15  
355 passed, giving 100% specificity. Fig. 6 showcases some examples of the augmented images  
356 collected. Visually, the augmented images are well segmented, and are dissimilar to the  
357 reference subjects, particularly in the second row of images, where the relative fat depth of  
358 the moving subject (green) is retained, but the cross-sectional area of the thigh is equated to  
359 the fixed subject (red). The misalignment of the muscle tissue within the registered images,  
360 visible as concentrations of either red or green colouration, establish a difference in the  
361 muscle geometry within the registered and original data. The augmented subjects generated  
362 for 1 target subject (subject 1) are presented within supplementary material 3, for visual  
363 comparison.

364 The anatomical variability of the muscles within the augmented database is compared  
365 to the original 11 subject database (Fig. 7). The volumes of each of the muscles within the  
366 original and augmented databases were normalised against the corresponding average  
367 muscle volume for each muscle within the respective databases. The percentage greater or  
368 smaller than the average volume was then calculated for each muscle, representing the  
369 variability of the muscle volumes within each database. The distributions of these  
370 percentages are presented (Fig. 7). The muscle volumes available within the augmented  
371 database were found to have a greater range of volumes, often 1.5 to 2 times greater than in  
372 the original database. The range of volumes for each muscle considered within the original  
373 and augmented databases are presented in supplementary material 4.

374 **Fig. 6:**

375 *Inputs, outputs and resulting augmented subjects. Each row of images presents results within the hip (left), thigh (centre),*  
376 *and shank (right) for 3 subject combinations chosen at random (target x reference: 4 x 5 (top), 1 x 3 (middle), 7 x 9 (bottom)).*  
377 *Within each cell there are the inputted images into the registration (left), registered images with corresponding target image*  
378 *(centre) and resulting segmented, augmented images (right). The muscle labels are visible within the augmented images as*  
379 *the blue areas. Each muscle is assigned a distinct greyscale value and the labels are assigned alphabetically.*

380 **Fig. 7:**

381 *The anatomical variability of muscle volumes for each muscle, ordered from smallest to largest within the original and*  
382 *augmented databases shown in red and blue respectively. The height of the distributions was not normalised, and the violin*  
383 *plot contains 95% of the data, with 2.5% of data cut off from each side, removing outliers.*

384

## 385 4. [Discussion](#)

386 This paper aimed at proposing a fully automatic tool to segment 23 major lower limb muscles  
387 simultaneously from MR imaging data using morphological image processing and deformable  
388 image registration. Furthermore, the same tool was used to generate a unique dataset  
389 including 69 fully segmented, augmented 3D images. To the best of the authors' knowledge,  
390 this study represents the first attempt to segment complete 3D muscle geometry of many  
391 individual muscles simultaneously using deformable image registration while using different  
392 subjects as the reference. This would be desirable as muscle segmentation of a new subject  
393 could be performed without the need for manual processing.

394 All 23 muscles were segmented from five subjects with moderate success, considering  
395 three error metrics, the RVE, DSC and HD. The registration quality was high considering the  
396 combination of subjects that resulted in the median average DSC (Fig. 4) which suggests that  
397 in most cases, the registration performed as intended. This was confirmed by the total volume  
398 error metric, lower than 10% on average. However, all three-error metrics reflected a lower  
399 accuracy for the segmentation of individual muscles. The individual muscle RVE was typically  
400 larger than that of an acceptable level of inter-operator dependence ( $\pm 10\%$ ) [15], with the  
401 lower and upper quartiles often exceeding  $\pm 10\%$  in most subject combinations. The mean  
402 absolute RVE within the optimal subject combinations was 12.7%, meaning that on average,  
403 there was an over or underestimation of the muscle volume greater than the effect of  
404 operator variability. This indicates that the method would be best suited when only interested  
405 in the volume of the overall muscle body. Capturing the total muscle volume has proven  
406 useful in studies such as Handsfield et al. [19], where regression equations were presented,  
407 to estimate individual muscle volume from total muscle volume and other anthropometric  
408 data such as height and BMI. The DSC results, on the other end, indicate that if the purpose  
409 of the segmentation was that of extracting internal muscle characteristics, such as the level  
410 of fat infiltration [10], then alternative approaches should be pursued. Possible improvements  
411 of the method could come from a more targeted selection of the reference subject, which as  
412 shown by the reported results (Fig. 5) can increase the accuracy of the approach both in terms  
413 of individual muscle volume and DSC. Further studies are needed to test this hypothesis.

414 The geometry of the 23 muscles was captured moderately well only in the optimal  
415 combination of subjects (those with greatest lower quartile), with mean DSC of 0.74 and IQR  
416 range of  $0.71 < \text{DSC} < 0.77$ . However, this is significantly smaller than the inter-operator  
417 dependence of the manual process, which, within the literature [2,15,21,24] is consistently  
418 found to be DSCs of around 0.90 for the muscles considered in this study. While the pair of



419 subjects leading to the best results in terms of DSC were the most similar in terms of height  
420 and BMI, these anthropometric characteristics were very different in the pair having the  
421 second-best DSC (mean = 0.74, IQR of  $0.69 < \text{DSC} < 0.79$ ). This suggests that the newly  
422 proposed masking process (code will be made available on GitHub) achieved the goal of  
423 homogenising the subject imaging data and could be adapted for the removal of unwanted  
424 artefacts from within medical or indeed any other images.

425         Particularly successful approaches within the literature that used 3D deformable  
426 image registration to perform muscle segmentation were those based on longitudinal data,  
427 such as Le Troter et al. [33] and Fontana et al. [27], who attained average DSC of 0.90 and  
428 0.85, respectively. Similar to the latter, were the DSC values here found when registering the  
429 left to right limb in the same subject. Notably, these approaches still require the manual  
430 segmentation of each subject at the baseline. Moreover, these studies segmented fewer  
431 muscles than the 23 presented in this study. Last but not least, the images collected within  
432 this study were not optimised for muscle segmentation.

433         Overall, the main limitation of the proposed method clearly lies in the non-satisfactory  
434 capture of individual muscle volume. These could have been caused by the propagation of  
435 inaccuracies associated with the manual segmentations of the reference images through the  
436 registration. However, this aspect is likely to be negligible since the muscles with high inter-  
437 operator variability [15] were discarded at source. More likely, the issue lied in the fact that  
438 the muscle-muscle boundaries present a weak grey-level gradient, in contrast to the muscle-  
439 fat boundaries, which are shown to have a strong grey-level gradient within the MR images  
440 (Fig. 1, 2, 4). Since SHIRT accounts for grey-level gradients within the inputted images [41],  
441 the muscle-fat and muscle-bone boundaries were registered to a higher degree of accuracy  
442 than the muscle-muscle boundaries. This unbalance in the accuracy of the registration of the  
443 different regions is highlighted by the greater RVE of the individual muscles, when compared  
444 to the total volume error. Finally, another source of error could lie within the optimisation  
445 process of the registration parameters (NS and smoothing coefficient) [41]. While in this study  
446 these parameters were optimised for the highest overall performance in segmentation  
447 accuracy across all considered lower limb muscles, the values could be optimised for the  
448 different areas of the limb. This was not implemented in this study as a rewriting of the  
449 registration toolkit would be required.

450         Despite the above limitations, the image registration protocol here proposed proved  
451 clearly useful when adopted to generate an augmented imaging database of 69 subjects  
452 having a much broader range of muscle volumes and geometries than the original 11 subject



453 database. This result came after removing 41 non anatomically realistic datasets, which  
454 required some manual checking the augmented datasets, suggesting that similar care should  
455 be taken if replicating the use of the method. These datasets, made publicly available, can be  
456 used to train deep learning methods [36,37,38,39]. Machine learning and deep learning  
457 methods are now dominant tools used within the field of medical image segmentation  
458 [21,24,48]. Where the average DSC found amongst the 23 muscles considered within the  
459 present study were found to be around 0.75, considering only the optimal reference subject  
460 for each target subject, deep learning methods have been used to segment the lower limb  
461 muscles with average DSC between 0.85 [21] and 0.90 [24]. These tools are typically only  
462 suitable for studies with extremely large cohorts, but this problem has been alleviated within  
463 some medical image analysis fields, such brain tumour assessment [38] and bone  
464 segmentation [39], through data augmentation. However, this technique is yet to have been  
465 explored for muscle segmentation and the database here presented will hopefully foster  
466 efforts in this direction. To the best of our knowledge, in fact, this is the first study providing  
467 a vast, multi-operator assessed set of fully segmented, labelled augmented MR imaging  
468 sequences of the lower limb. In future work, these augmented datasets will be used to  
469 calibrate CNN models, with the potential to increase segmentation accuracy [36,37] and lead  
470 to a solution for the automatic segmentation and characterisation of muscles in vivo.

## 471 5. Conclusion

472 This study presented a novel, fully automatic muscle segmentation method using image  
473 registration, aimed at segmenting all lower limb muscles simultaneously. The results fit in well  
474 with those studies within the literature that also use image registration to segment muscle  
475 sections or individual muscles. The 3D deformable image registration is limited in its capacity  
476 to perform individual automatic muscle segmentation with a high accuracy. Nevertheless, this  
477 approach can be useful to provide total muscle volume and can be further optimised by  
478 increasing the number of reference datasets. Moreover, the publicly available augmented  
479 database built in this work would enhance any future study that would aim to use deep  
480 learning approaches for the segmentation of muscles from MR images.

## 481 6. Acknowledgements

482 The study was partially funded by Engineering and Physical Sciences Research Council (EPSRC)  
483 Frontier Multisim Grant (EP/K03877X/1 and EP/S032940/1). The authors would like to extend  
484 specific thanks to Dr. Erica Montefiori and Dr. Claude Fiifi Hayford for their assistance in this  
485 project. Lastly, we are particularly grateful for the participants that volunteered for the study.

## 486 7. References

- 487 1. Pandy MG, Andriacchi TP. Muscle and joint function in human locomotion. Annual  
488 Rev Biomed Eng. 2010 Aug 15;12:401-33. doi: 10.1146/annurev-bioeng-070909-  
489 105259. PMID: 20617942.
- 490 2. Modenese L, Montefiori E, Wang A, Wesarg S, Viceconti M, Mazzà C. Investigation  
491 of the dependence of joint contact forces on musculotendon parameters using a  
492 codified workflow for image-based modelling. J Biomech. 2018 May 17;73:108-  
493 118. doi: 10.1016/j.jbiomech.2018.03.039. Epub 2018 Mar 30. PMID: 29673935
- 494 3. Hamrick MW, McGee-Lawrence ME, Frechette, DM. Fatty infiltration of skeletal  
495 muscle: mechanisms and comparisons with bone marrow adiposity. Front.  
496 Endocrinol., 20 June 2016. doi: <https://doi.org/10.3389/fendo.2016.00069>
- 497 4. Larsson L, Grimby G, Karlsson J. Muscle strength and speed of movement in  
498 relation to age and muscle morphology. Journal of Applied Physiology. 1979;  
499 46(3):451–6. doi: <https://doi.org/10.1152/jappl.1979.46.3.451> PMID: 438011
- 500 5. Redl C, foehler MG, Pandy MG. Sensitivity of muscle force estimates to variations  
501 in muscle–tendon properties. Human Movement Science, Volume 26, Issue 2,  
502 2007, Pages 306-319, ISSN 0167-9457, doi:  
503 <https://doi.org/10.1016/j.humov.2007.01.008>.
- 504 6. Valente G, Pitto L, Testi D, Seth A, Delp SL, Stagni R, et al. (2014) Are Subject-  
505 Specific Musculoskeletal Models Robust to the Uncertainties in Parameter  
506 Identification? PLoS ONE 9(11): e112625. doi:  
507 <https://doi.org/10.1371/journal.pone.0112625>
- 508 7. Aoyagi Y, Shephard RJ. Aging and muscle function. Sports Med. 1992  
509 Dec;14(6):376-96. doi: 10.2165/00007256-199214060-00005. PMID: 1470791.
- 510 8. Yoshiko A, Hioki M, Kanehira N, Shimaoka K, Koike T, Sakakibara H, et al. Three-  
511 dimensional comparison of intramuscular fat content between young and old  
512 adults. BMC medical imaging. 2017; 17(1):1–8. <https://doi.org/10.1186/s12880-016-0171-7> PMID: 28056868
- 514 9. Cruz-jentoft AJ, Landi F. Sarcopenia. Clin Med (Lond) 2014 Apr; 14(2): 183–  
515 186. doi: 10.7861/clinmedicine.14-2-183 PMID: 24715131

- 516 10. Gadermayr M, Disch C, Müller M, Merhof D, Gess B. A comprehensive study on  
517 automated muscle segmentation for assessing fat infiltration in neuromuscular  
518 diseases. *Magn Reson Imaging*. 2018 May;48:20-26. doi:  
519 10.1016/j.mri.2017.12.014. Epub 2017 Dec 18. PMID: 29269318.
- 520 11. Lareau-Trudel E, Le Troter A, Ghattas B, Pouget J, Attarian S, Bendahan D, et al.  
521 (2015) Muscle Quantitative MR Imaging and Clustering Analysis in Patients with  
522 Facioscapulohumeral Muscular Dystrophy Type 1. *PLoS ONE* 10(7): e0132717.  
523 <https://doi.org/10.1371/journal.pone.0132717>
- 524 12. Mercuri E, Pichiecchio A, Allsop J, Messina S, Pane M, Muntoni F. Muscle MRI in  
525 inherited neuromuscular disorders: past, present, and future. *J Magn Reson*  
526 *Imaging*. 2007 Feb;25(2):433-40. doi: 10.1002/jmri.20804. PMID: 17260395.
- 527 13. Morrow JM, Sinclair CD, Fischmann A, Machado PM, Reilly MM, Yousry TA,  
528 Thornton JS, Hanna MG. MRI biomarker assessment of neuromuscular disease  
529 progression: a prospective observational cohort study. *Lancet Neurol*. 2016  
530 Jan;15(1):65-77. doi: 10.1016/S1474-4422(15)00242-2. Epub 2015 Nov 6. PMID:  
531 26549782; PMCID: PMC4672173.
- 532 14. Sookhoo S, Mackinnon I, Bushby K, Chinnery PF, Birchall D. MRI for the  
533 demonstration of subclinical muscle involvement in muscular dystrophy. *Clin*  
534 *Radiol*. 2007 Feb;62(2):160-5. doi: 10.1016/j.crad.2006.08.012. PMID: 17207699.
- 535 15. Montefiori E, Kalkman BM, Henson WH, Paggiosi MA, McCloskey EV, Mazzà C  
536 (2020) MRI-based anatomical characterisation of lower-limb muscles in older  
537 women. *PLoS ONE* 15(12): e0242973.  
538 <https://doi.org/10.1371/journal.pone.0242973>
- 539 16. Carbone V, Fluit R, Pellikaan P, van der Krogt MM, Janssen D, Damsgaard M,  
540 Vigneron L, Feilkas T, Koopman HF, Verdonschot N. TLEM 2.0 - a comprehensive  
541 musculoskeletal geometry dataset for subject-specific modeling of lower  
542 extremity. *J Biomech*. 2015 Mar 18;48(5):734-41. doi:  
543 10.1016/j.jbiomech.2014.12.034. Epub 2015 Jan 8. PMID: 25627871.
- 544 17. Larsson L, Grimby G, Karlsson J. Muscle strength and speed of movement in  
545 relation to age and muscle morphology. *Journal of Applied Physiology*.  
546 1979;46(3):451-6. pmid:438011

- 547 18. Suganthi GV, Sutha J, Pavarthi M, Devi CD. Pectoral muscle segmentation in  
548 mammograms. *Biomed Pharmacol J* 2020;13(3).
- 549 19. Handsfield GG, Meyer CH, Hart JM, Abel MF, Blemker SS. Relationships of 35 lower  
550 limb muscles to height and body mass quantified using MRI. *J Biomech*. 2014 Feb  
551 7;47(3):631-8. doi: 10.1016/j.jbiomech.2013.12.002. Epub 2013 Dec 11. PMID:  
552 24368144.
- 553 20. Ding J, Cao P, Chang HC, *et al*. Deep learning-based thigh muscle segmentation for  
554 reproducible fat fraction quantification using fat–water decomposition  
555 MRI. *Insights Imaging* 11, 128 (2020). [https://doi.org/10.1186/s13244-020-](https://doi.org/10.1186/s13244-020-00946-8)  
556 00946-8
- 557 21. Zhu J, Bolsterlee B, Chow BVY, Cai C, Herbert RD, Song Y, Meijering E. Deep learning  
558 methods for automatic segmentation of lower leg muscles and bones from MRI  
559 scans of children with and without cerebral palsy. *NMR Biomed*. 2021  
560 Dec;34(12):e4609. doi: 10.1002/nbm.4609. Epub 2021 Sep 21. PMID: 34545647.
- 561 22. Arnold EM, Ward SR, Lieber RL, *et al*. A Model of the Lower Limb for Analysis of  
562 Human Movement. *Ann Biomed Eng* 38, 269–279 (2010).  
563 <https://doi.org/10.1007/s10439-009-9852-5>
- 564 23. Modenese L, Kohout J. Automated Generation of Three-Dimensional Complex  
565 Muscle Geometries for Use in Personalised Musculoskeletal Models. *Ann Biomed*  
566 *Eng* 48, 1793–1804 (2020). <https://doi.org/10.1007/s10439-020-02490-4>
- 567 24. Ni R, Meyer CH, Blemker SS, Hart JM, Feng X. Automatic segmentation of all lower  
568 limb muscles from high-resolution magnetic resonance imaging using a cascaded  
569 three-dimensional deep convolutional neural network. *J Med Imaging*  
570 (Bellingham). 2019 Oct;6(4):044009. doi: 10.1117/1.JMI.6.4.044009. Epub 2019  
571 Dec 28. PMID: 31903406; PMCID: PMC6935014.
- 572 25. Engstrom CM, Fripp J, Jurcak V, Walker DG, Salvado O, Crozier S. Segmentation of  
573 the quadratus lumborum muscle using statistical shape modeling. *J Magn Reson*  
574 *Imaging*. 2011 Jun;33(6):1422-9. doi: 10.1002/jmri.22188. PMID: 21591012.
- 575 26. Engstrom CM, Walker DG, Kippers V, Mehnert AJ. Quadratus lumborum  
576 asymmetry and L4 pars injury in fast bowlers: a prospective MR study. *Med Sci*  
577 *Sports Exerc*. 2007 Jun;39(6):910-7. doi: 10.1249/mss.0b013e3180408e25. PMID:  
578 17545879.

- 579 27. Fontana L, Mastropietro A, Scalco E, et al. Multi-Steps Registration Protocol for  
580 Multimodal MR Images of Hip Skeletal Muscles in a Longitudinal Study. *Appl.*  
581 *Sci.* 2020, 10(21), 7823; <https://doi.org/10.3390/app10217823>
- 582 28. Hides J, Stanton W, Freke M, Wilson S, McMahon S, Richardson CA. MRI study of  
583 the size, symmetry and function of the trunk muscles among elite cricketers with  
584 and without low back pain. *Br J Sports Med* 2008; 42: 809–813.
- 585 29. Lexell J, Taylor CC. Variability in muscle fibre areas in whole human quadriceps  
586 muscle: effects of increasing age. *J Anat.* 1991 Feb;174:239-49. PMID: 2032938;  
587 PMCID: PMC1256058.
- 588 30. Duda GN, Brand D, Freitag S, Lierse W, Schneider E. Variability of femoral muscle  
589 attachments. *J Biomech.* 1996 Sep;29(9):1185-90. doi: 10.1016/0021-  
590 9290(96)00025-5. PMID: 8872275.
- 591 31. Holzbaur KR, Murray WM, Gold GE, Delp SL. Upper limb muscle volumes in adult  
592 subjects. *J Biomech.* 2007;40(4):742-9. doi: 10.1016/j.jbiomech.2006.11.011. Epub  
593 2007 Jan 22. PMID: 17241636.
- 594 32. Ogier A, Sdika M, Foure A, Le Troter A, Bendahan D. Individual muscle  
595 segmentation in MR images: A 3D propagation through 2D non-linear registration  
596 approaches. *Annu Int Conf IEEE Eng Med Biol Soc.* 2017 Jul;2017:317-320. doi:  
597 10.1109/EMBC.2017.8036826. PMID: 29059874.
- 598 33. Le Troter A, Fouré A, Guye M, Confort-Gouny S, Mattei JP, Gondin J, Salort-  
599 Campana E, Bendahan D. Volume measurements of individual muscles in human  
600 quadriceps femoris using atlas-based segmentation approaches. *MAGMA.* 2016  
601 Apr;29(2):245-57. doi: 10.1007/s10334-016-0535-6. Epub 2016 Mar 16. PMID:  
602 26983429.
- 603 34. Fontana, L, Mastropietro A, Scalco E, et al. Multi-Steps Registration Protocol for  
604 Multi-modal MR Images of Hip Skeletal Muscles in a Longitudinal Study. November  
605 2020, *Applied Sciences* 10(21):7823 doi: 10.3390/app10217823
- 606 35. Hesamian MH, Jia W, He X, et al. Deep Learning Techniques for Medical Image  
607 Segmentation: Achievements and Challenges. *J Digit Imaging* 32, 582–596 (2019).  
608 <https://doi.org/10.1007/s10278-019-00227-x>
- 609 36. Shen Z, Xu Z, Olut S, Niethammer M. Anatomical Data Augmentation via Fluid-  
610 based Image Registration. arXiv 2020 doi: 10.48550/ARXIV.2007.02447

- 611 37. Shorten C, Khoshgoftaar TM. A survey on Image Data Augmentation for Deep  
612 Learning. *J Big Data* 6, 60 (2019). <https://doi.org/10.1186/s40537-019-0197-0>
- 613 38. Nalepa J, Marcinkiewicz M, Kawulok M. Data augmentation for brain-tumor  
614 segmentation: a review. *Front. Comput. Neurosci.*, December 2019 doi:  
615 <https://doi.org/10.3389/fncom.2019.00083>
- 616 39. Noguchi S, Nishio M, Yakami M, Nakagomi K, Togashi K. Bone segmentation on  
617 whole-body CT using convolutional neural network with novel data augmentation  
618 techniques. *Computers in Biology and Medicine*, Volume 121, 2020, 103767, ISSN  
619 0010-4825, doi: <https://doi.org/10.1016/j.combiomed.2020.103767>.
- 620 40. Canny J. *A Computational Approach To Edge Detection*, *IEEE Transactions on*  
621 *Pattern Analysis and Machine Intelligence*, 8(6):679–698, 1986.
- 622 41. Barber DC, Hose DR. Automatic segmentation of medical images using image  
623 registration: diagnostic and simulation applications. *J Med Eng Technol.* 2005 Mar-  
624 Apr;29(2):53-63. doi: 10.1080/03091900412331289889. PMID: 15804853.
- 625 42. Barber DC, Oubel E, Frangi AF, Hose DR. Efficient computational fluid dynamics  
626 mesh generation by image registration. *Medical Image Analysis*, Volume 11, Issue  
627 6, 2007, Pages 648-662, ISSN 1361-8415, doi:  
628 <https://doi.org/10.1016/j.media.2007.06.011>.
- 629 43. Dall’Ara E, Barber D, Viceconti M, About the inevitable compromise between  
630 spatial resolution and accuracy of strain measurement for bone tissue: A 3D zero-  
631 strain study, *Journal of Biomechanics*, Volume 47, Issue 12, 2014, Pages 2956-  
632 2963, ISSN 0021-9290, <https://doi.org/10.1016/j.jbiomech.2014.07.019>.
- 633 44. Hayford CF, Montefiori E, Pratt E, Mazzà C. Predicting longitudinal changes in joint  
634 contact forces in a juvenile population: scaled generic versus subject-specific  
635 musculoskeletal models. *Comput Methods Biomech Biomed Engin.* 2020  
636 Oct;23(13):1014-1025. doi: 10.1080/10255842.2020.1783659. Epub 2020 Jun 26.  
637 PMID: 32588655.
- 638 45. Dice LR. (1945). Measures of the Amount of Ecologic Association Between  
639 Species. *Ecology.* 26 (3): 297–302. doi:10.2307/1932409. JSTOR 1932409.
- 640 46. Rockafellar R, Wets I, Roger JB, (2005). *Variational Analysis*. Springer-Verlag.  
641 p. 117. ISBN 3-540-62772-3.

- 642 47. Thelen DG. (February 14, 2003). Adjustment of Muscle Mechanics Model  
643 Parameters to Simulate Dynamic Contractions in Older Adults . ASME. *J Biomech*  
644 *Eng.* February 2003; 125(1): 70–77. doi: <https://doi.org/10.1115/1.1531112>
- 645 48. Lenchik L, Heacock L, Weaver AA, et al. Automated Segmentation of Tissues Using  
646 CT and MRI: A Systematic Review, Academic Radiology, Volume 26, Issue  
647 12, 2019, Pages 1695-1706, ISSN 1076-6332, doi:  
648 <https://doi.org/10.1016/j.acra.2019.07.006>.

## 649 8. Supporting documents

- 650 **S1 Table. Muscle volumes of the 5 subjects automatically segmented in the study.**
- 651 **S2 Appendix. Sensitivity analysis of the two registration parameters: Nodal spacing, and the**  
652 **smoothing coefficient.**
- 653 **S3 Appendix. Visualisation of augmented datasets for one target subject.**
- 654 **S4 Appendix. Comparisons of muscle volumes within the original and the augmented**  
655 **databases.**



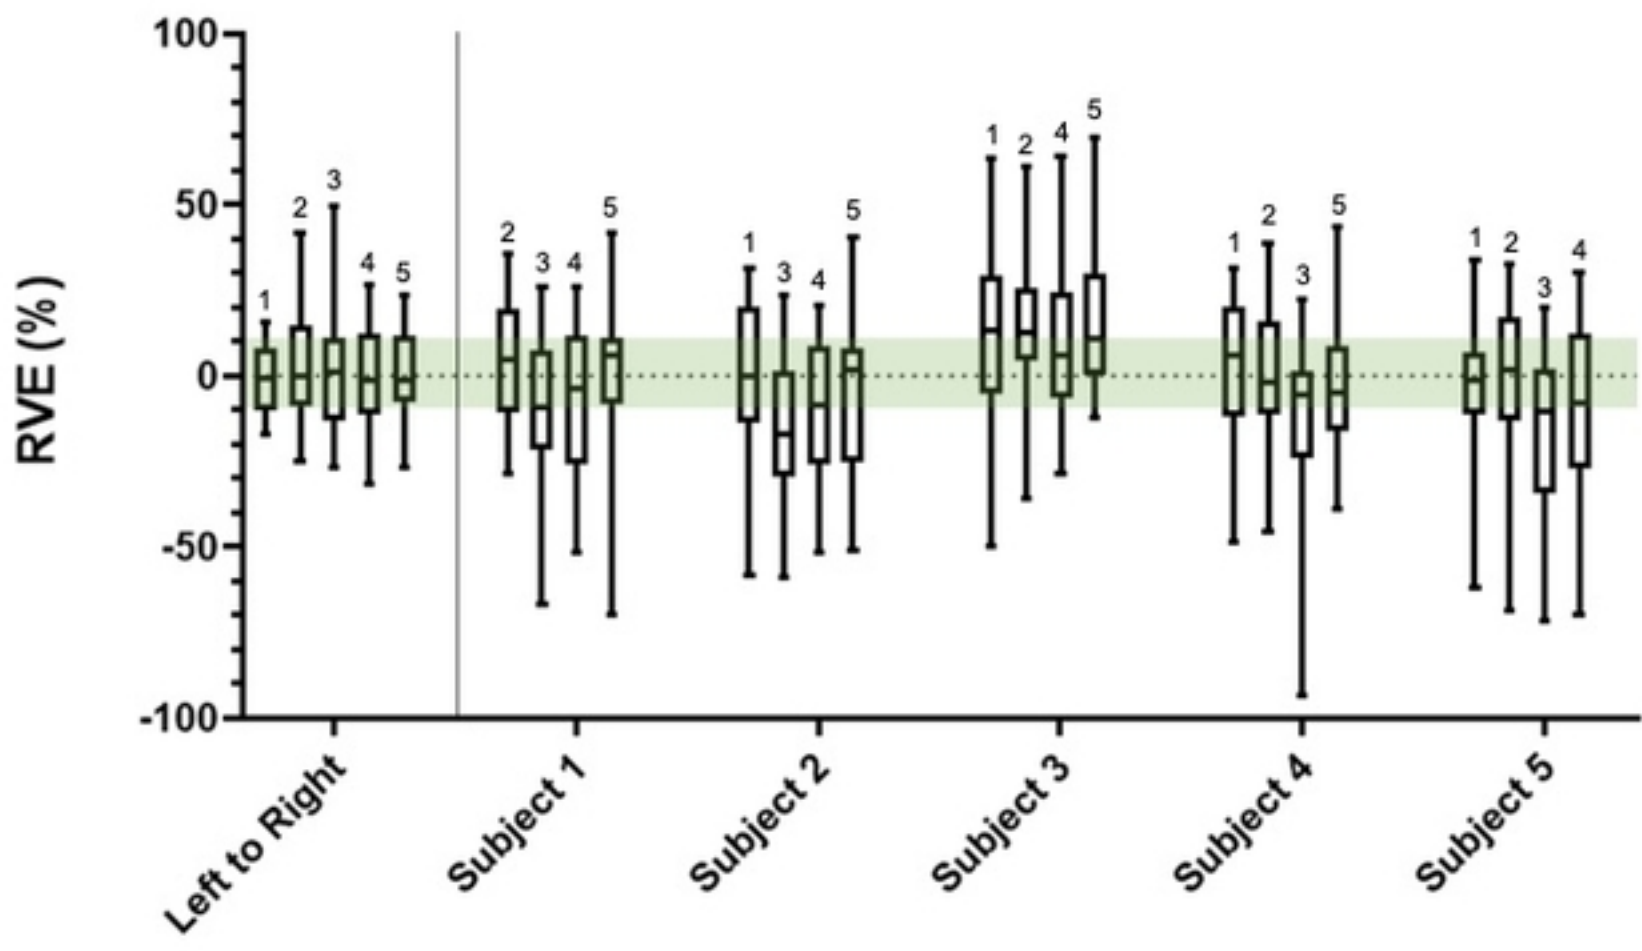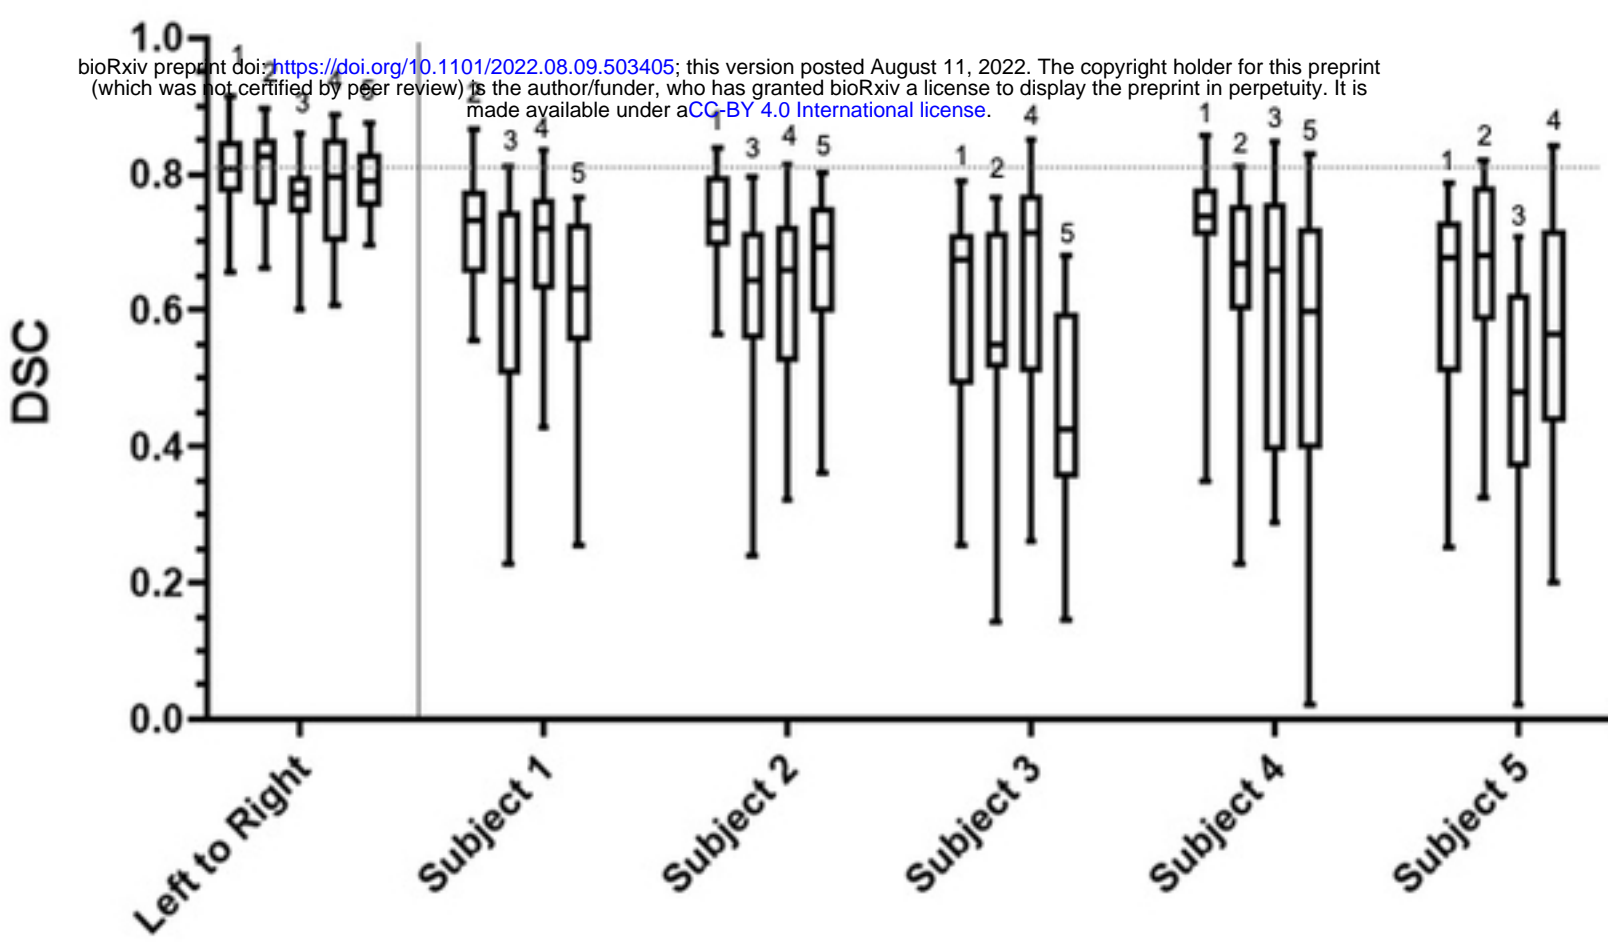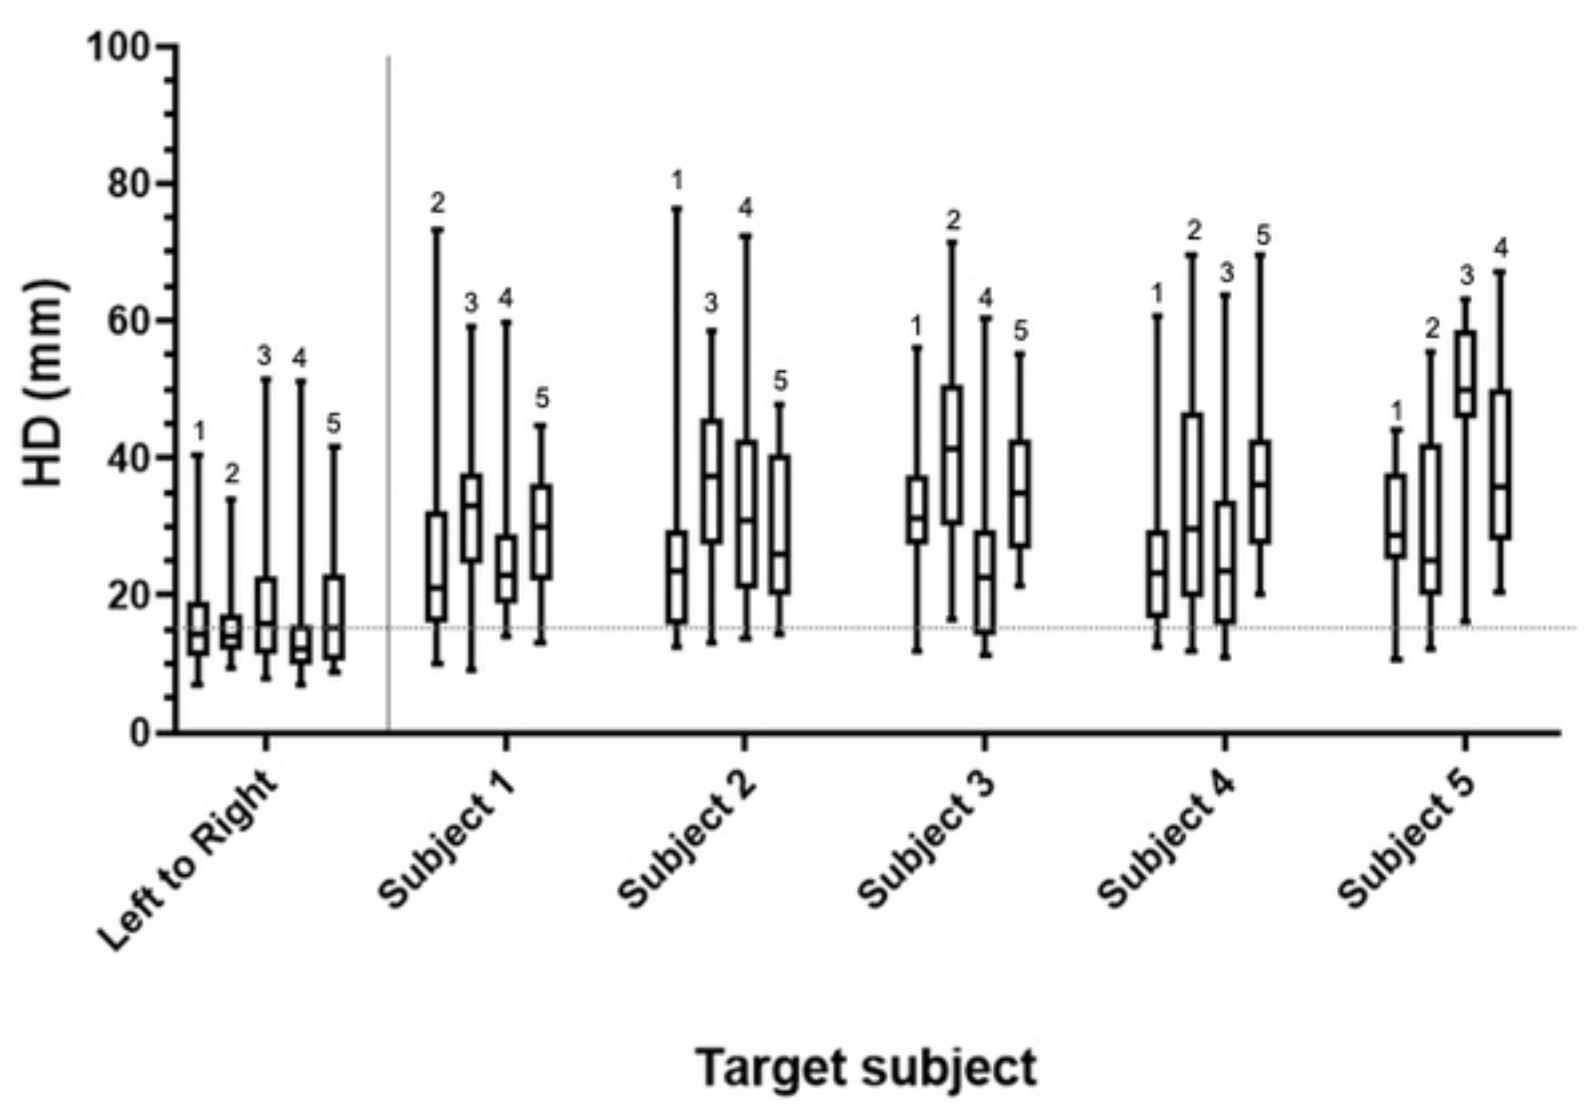

bioRxiv preprint doi: <https://doi.org/10.1101/2022.08.09.503405>; this version posted August 11, 2022. The copyright holder for this preprint (which was not certified by peer review) is the author/funder, who has granted bioRxiv a license to display the preprint in perpetuity. It is made available under aCC-BY 4.0 International license.

Figure 5



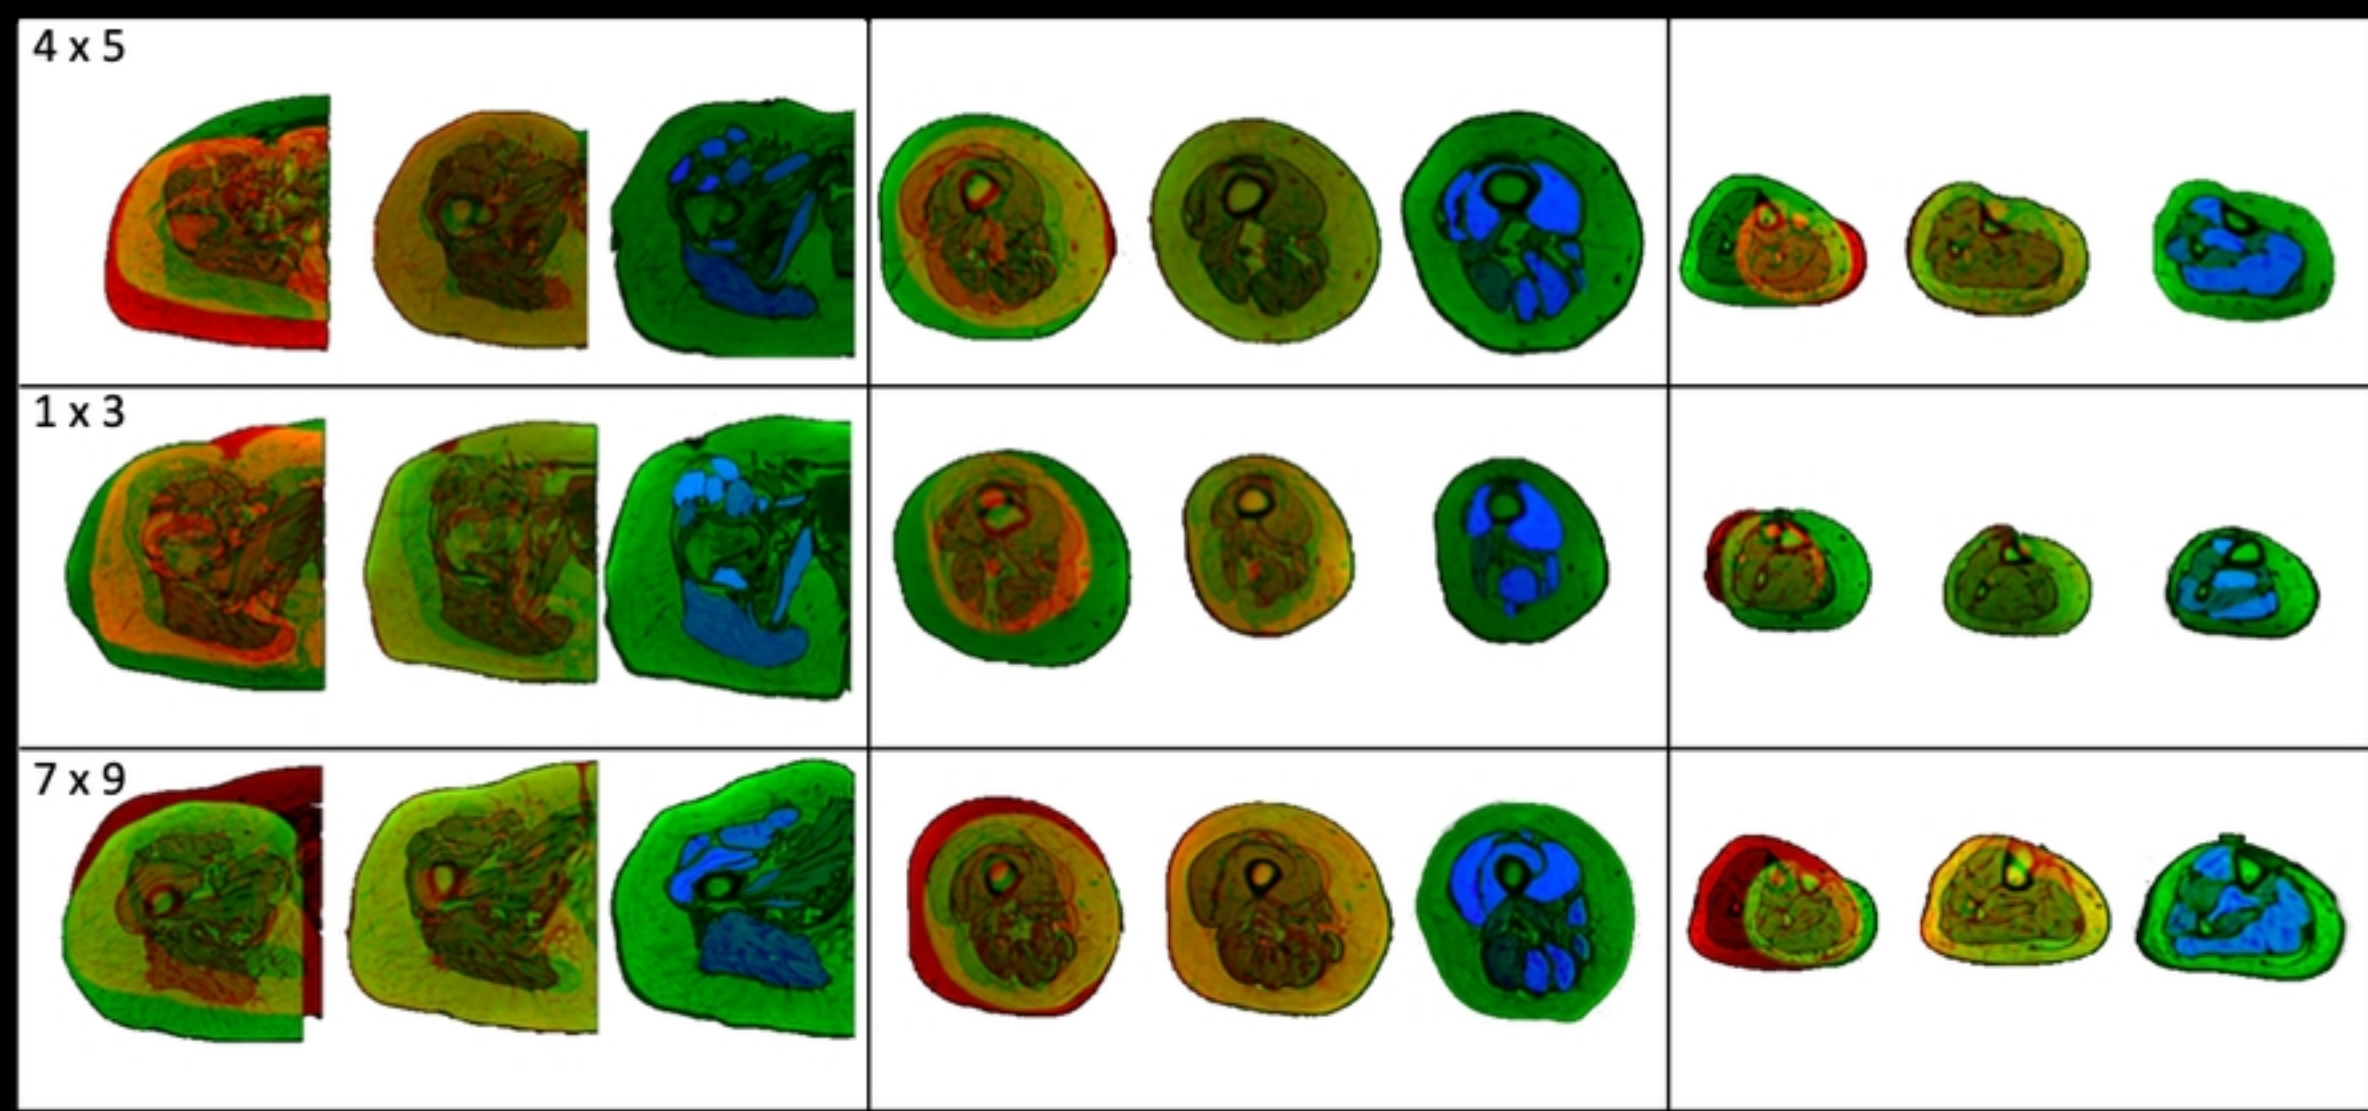

Figure 6

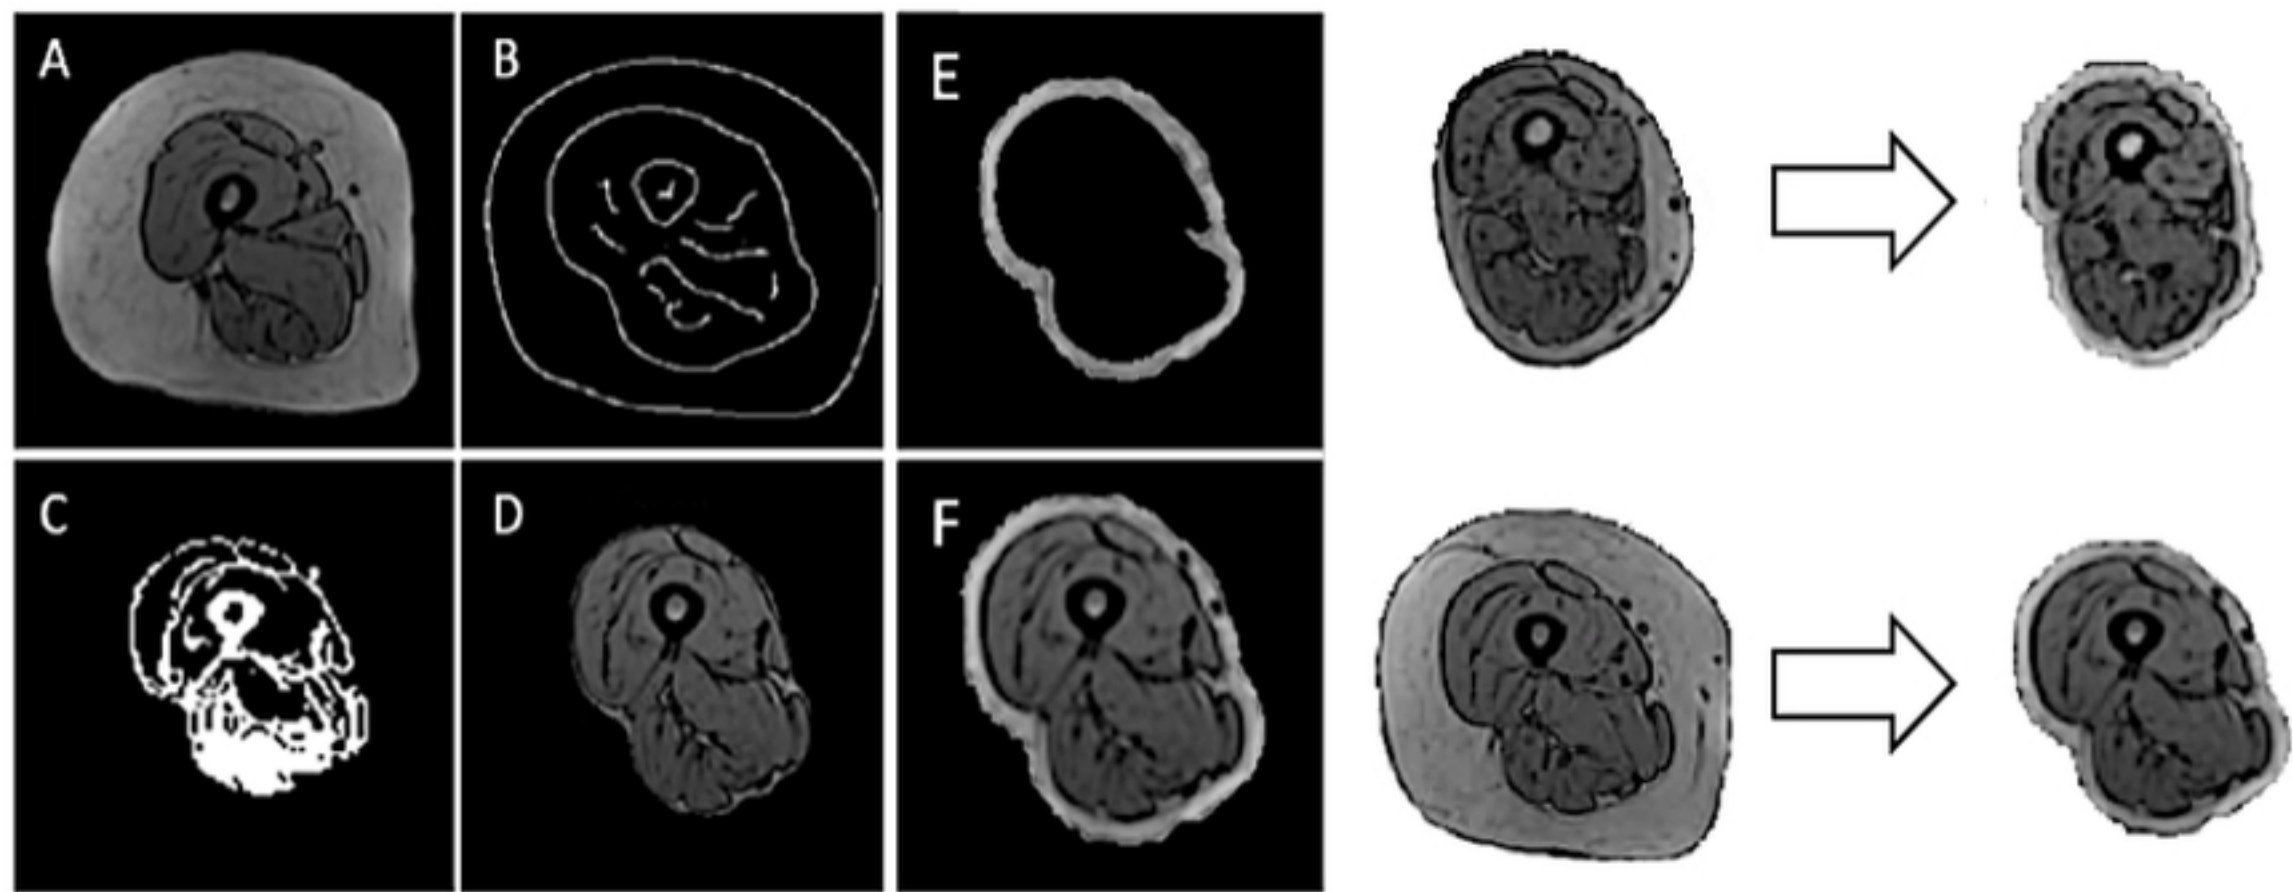

Figure 1

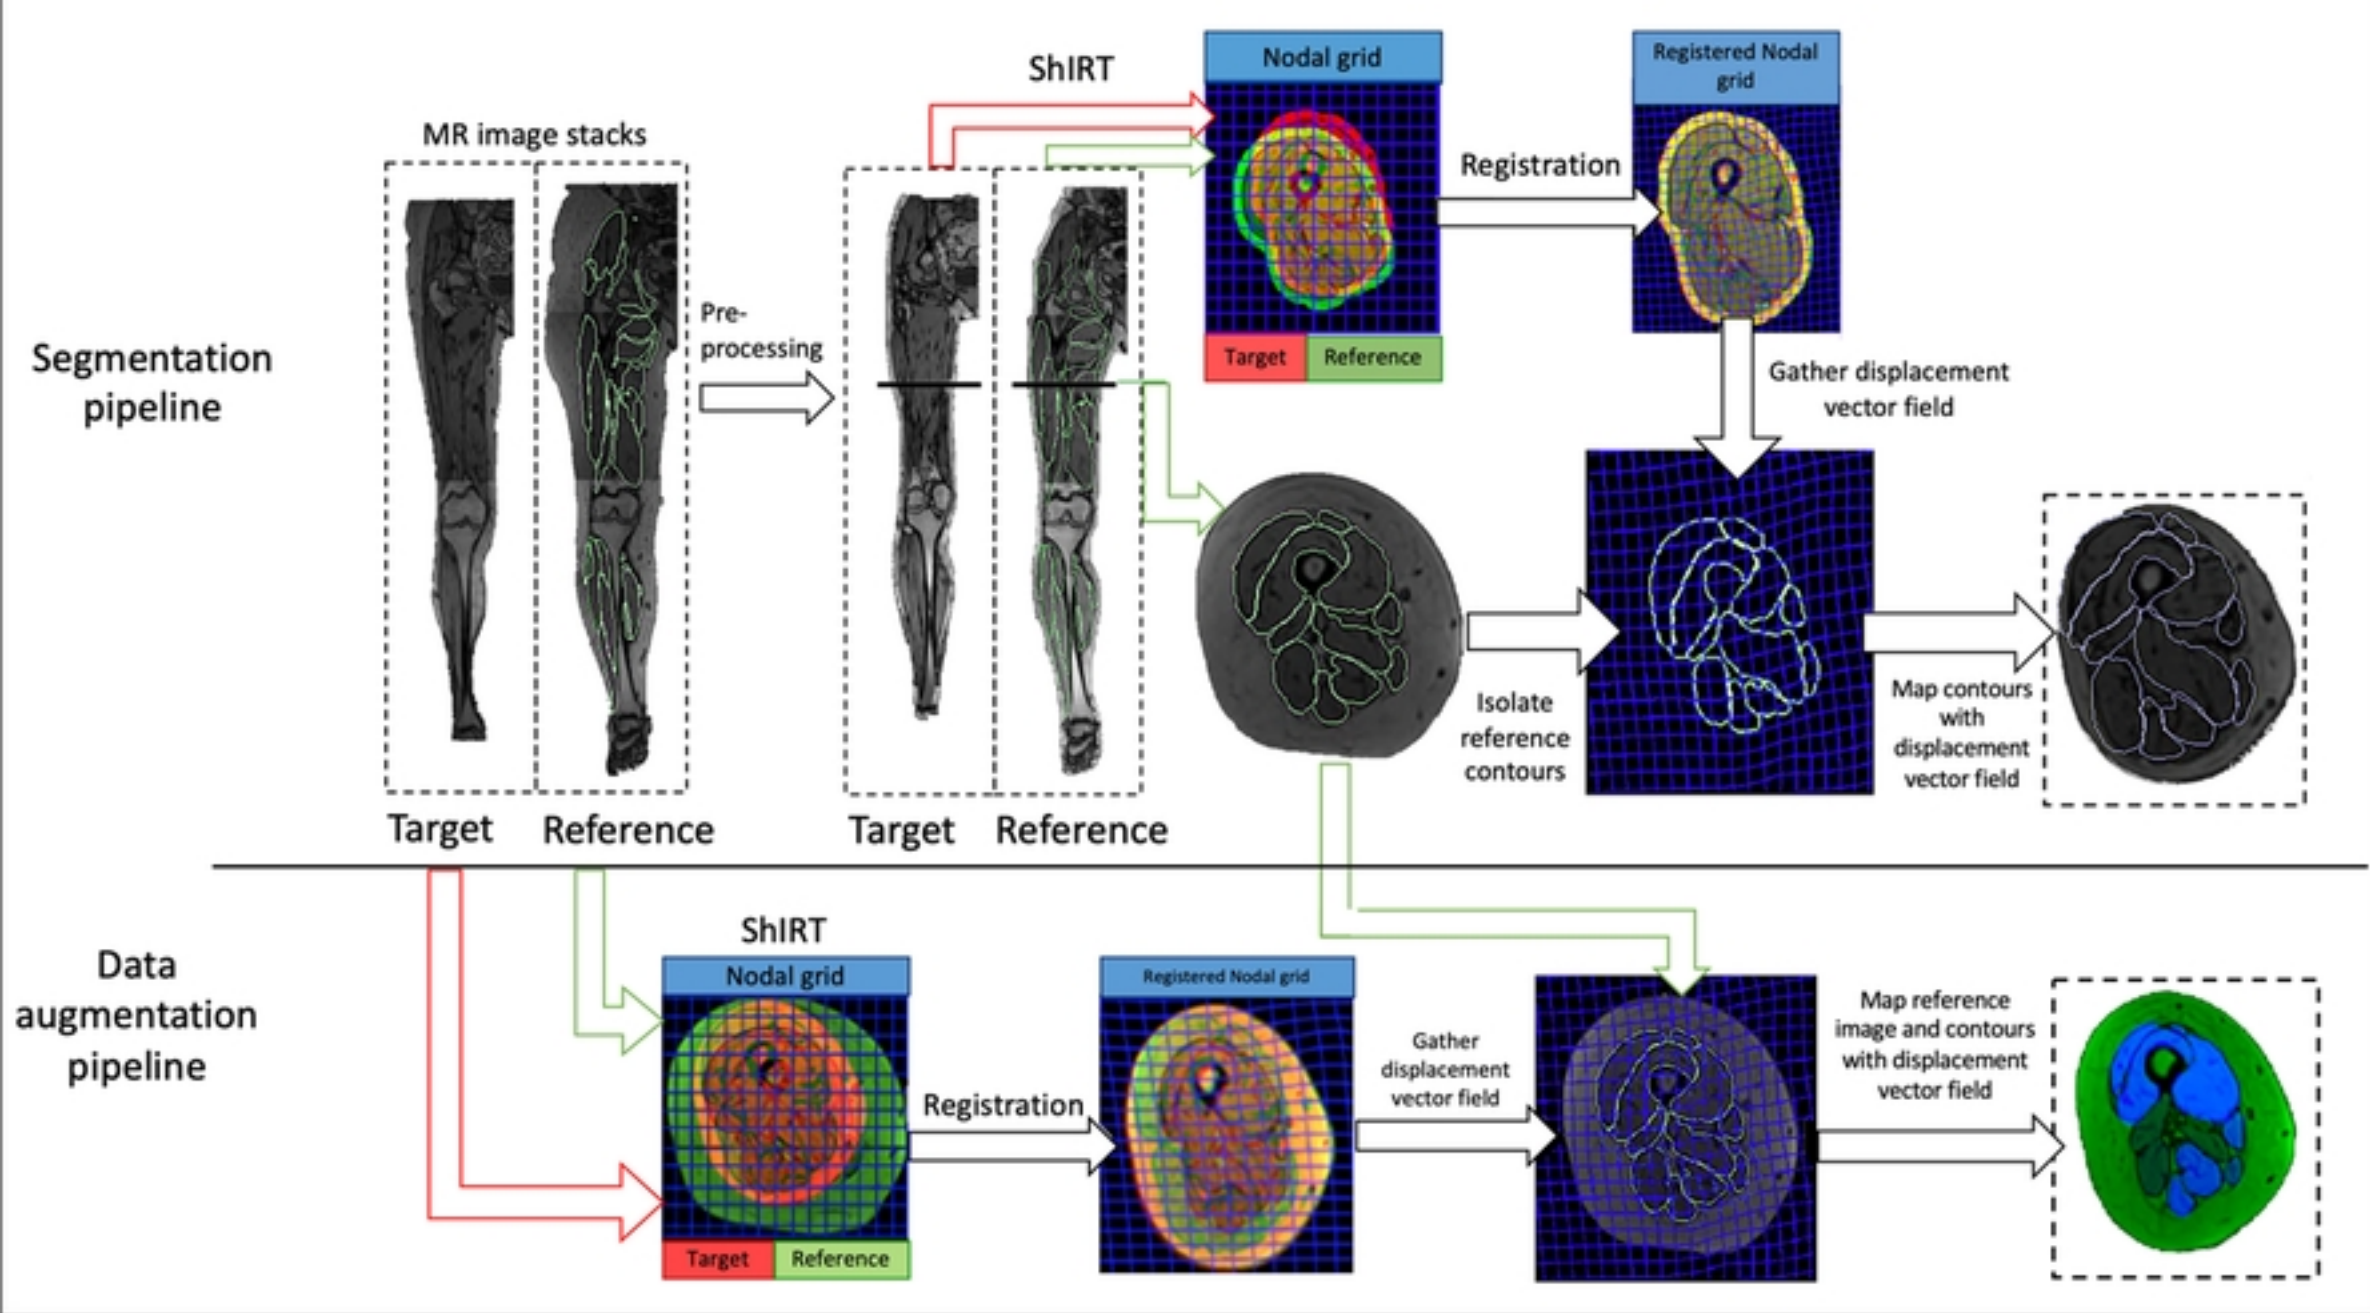

Figure 2

a)

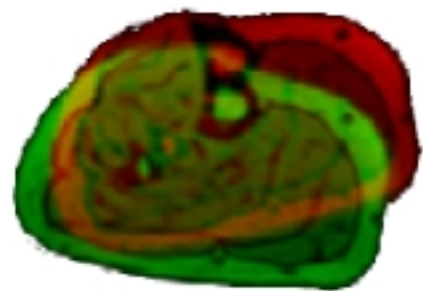

b)

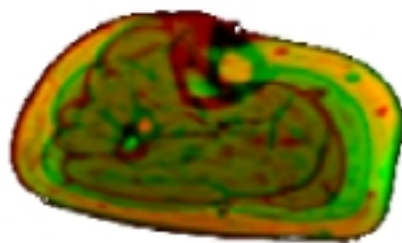

c)

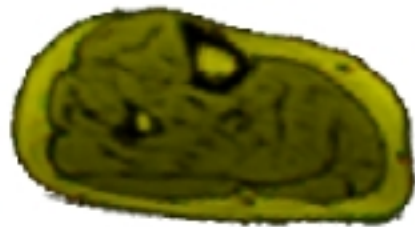

Figure 3



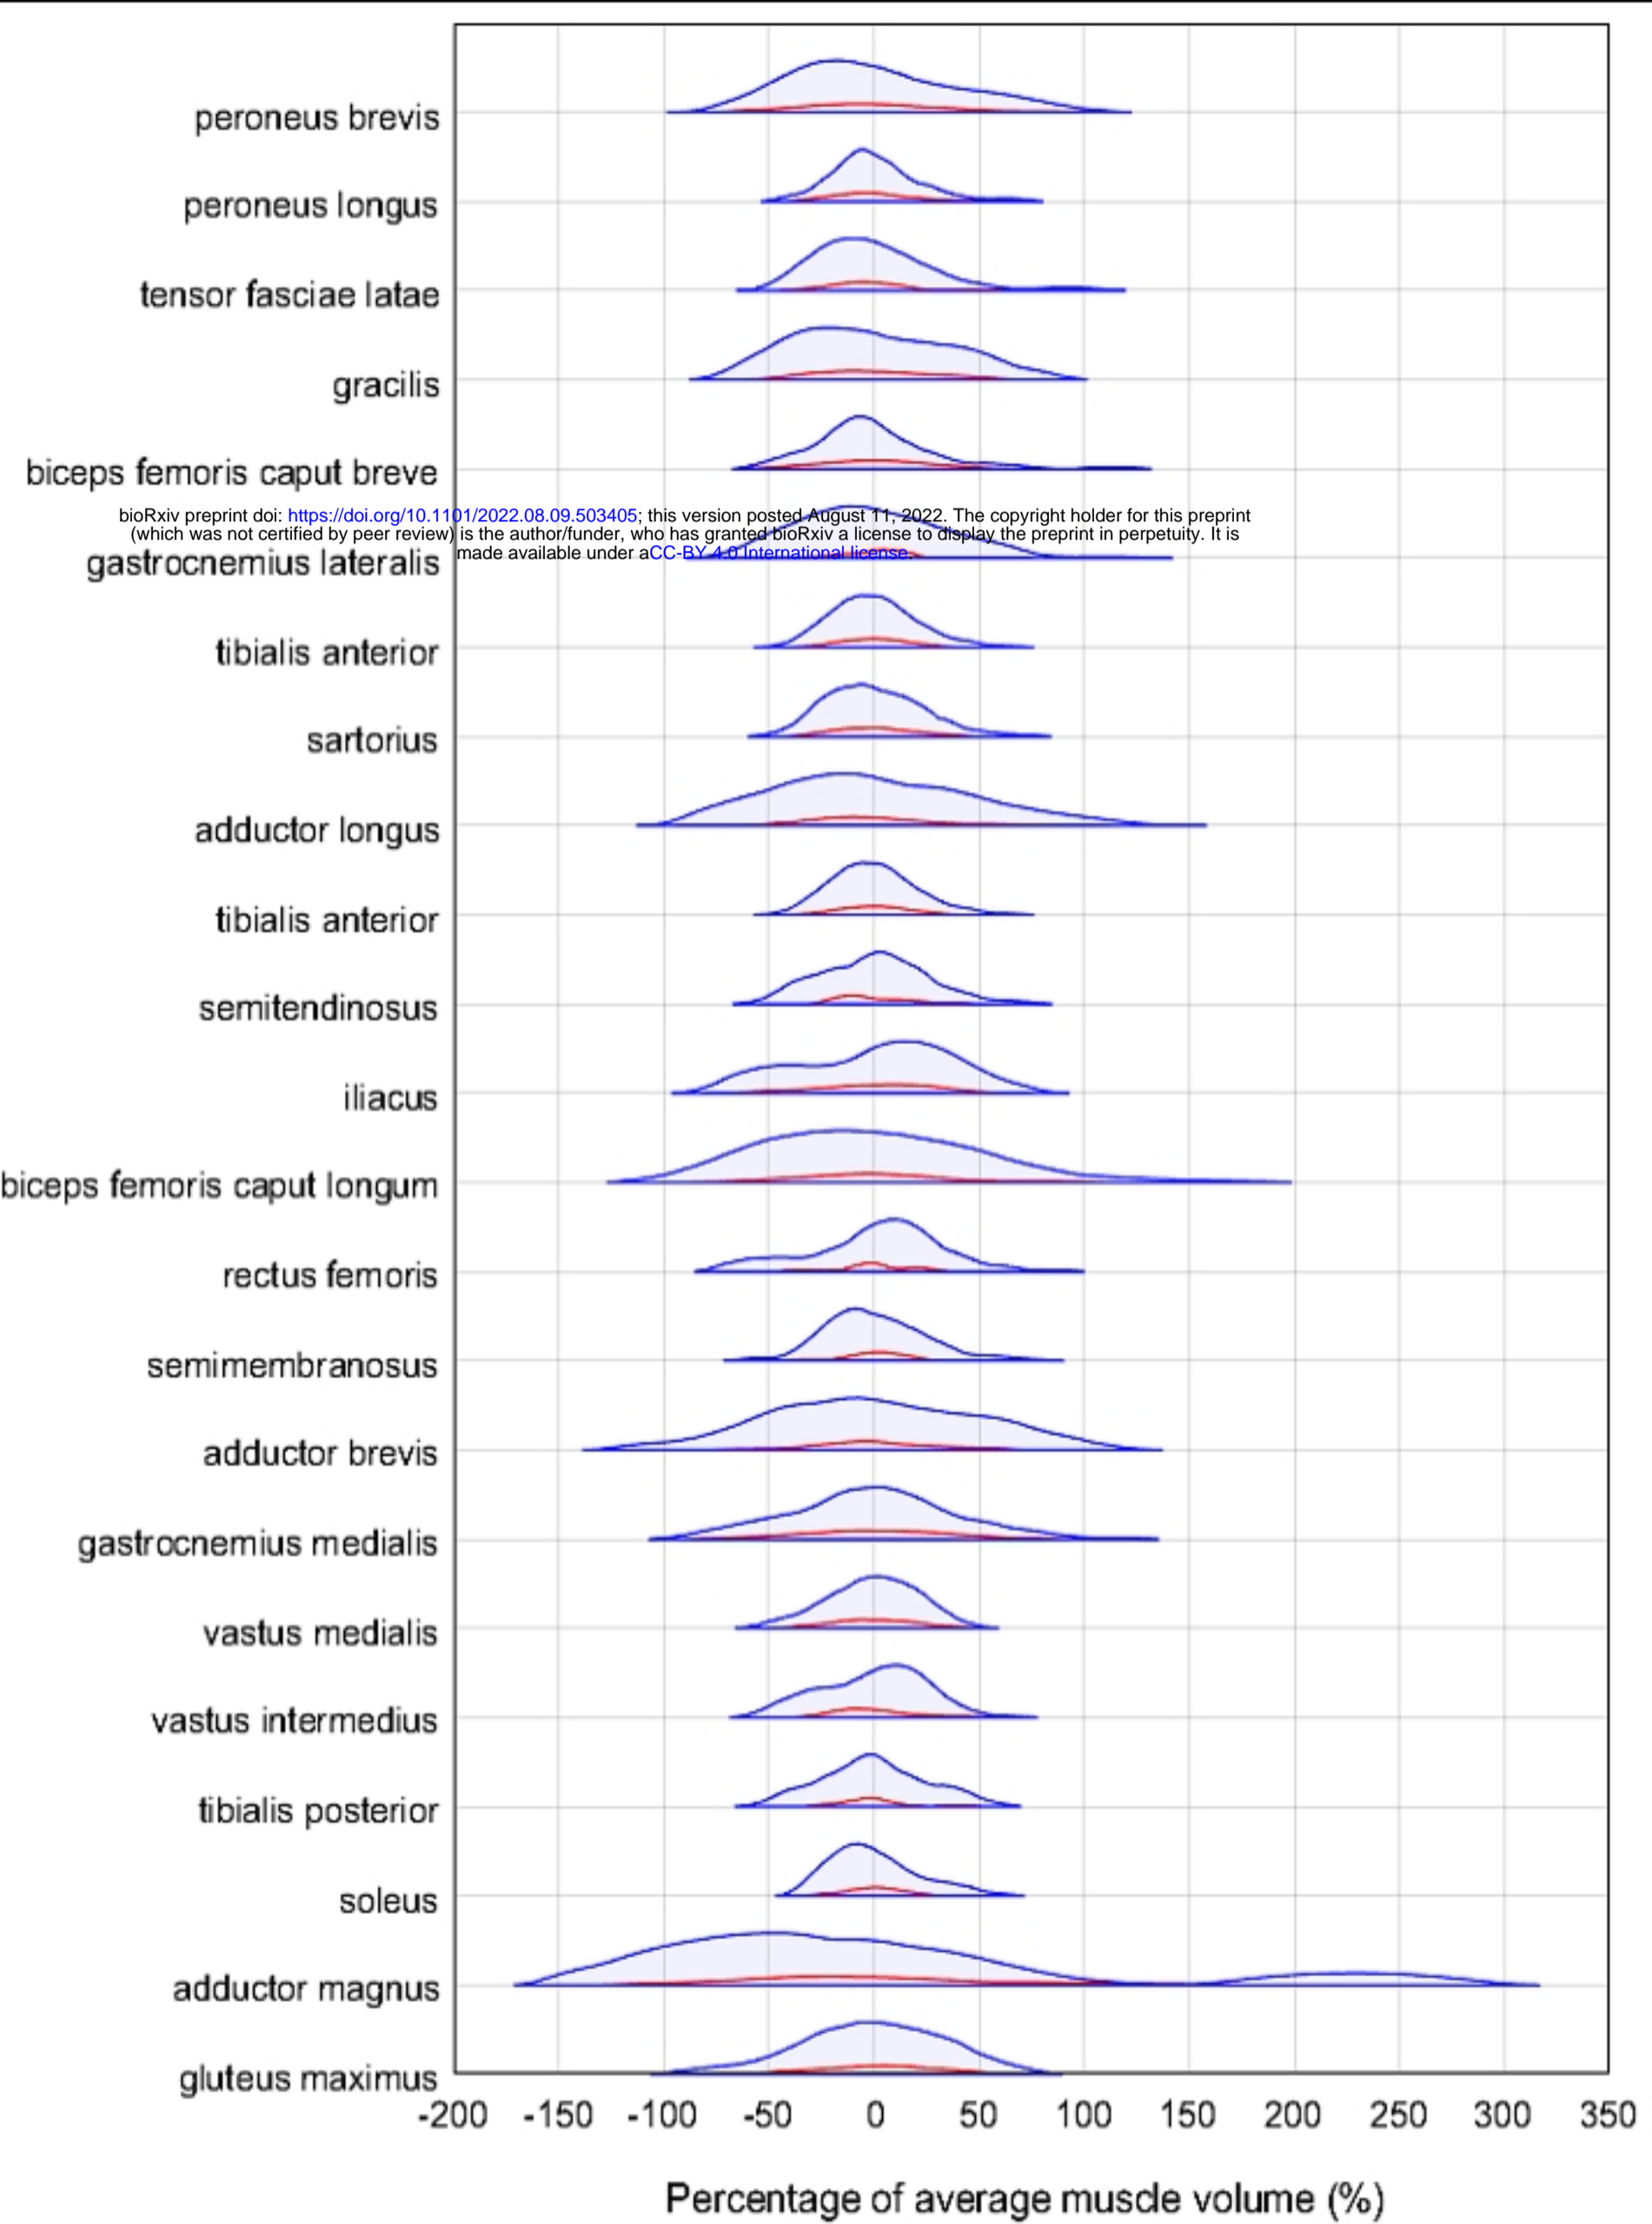

Figure 7

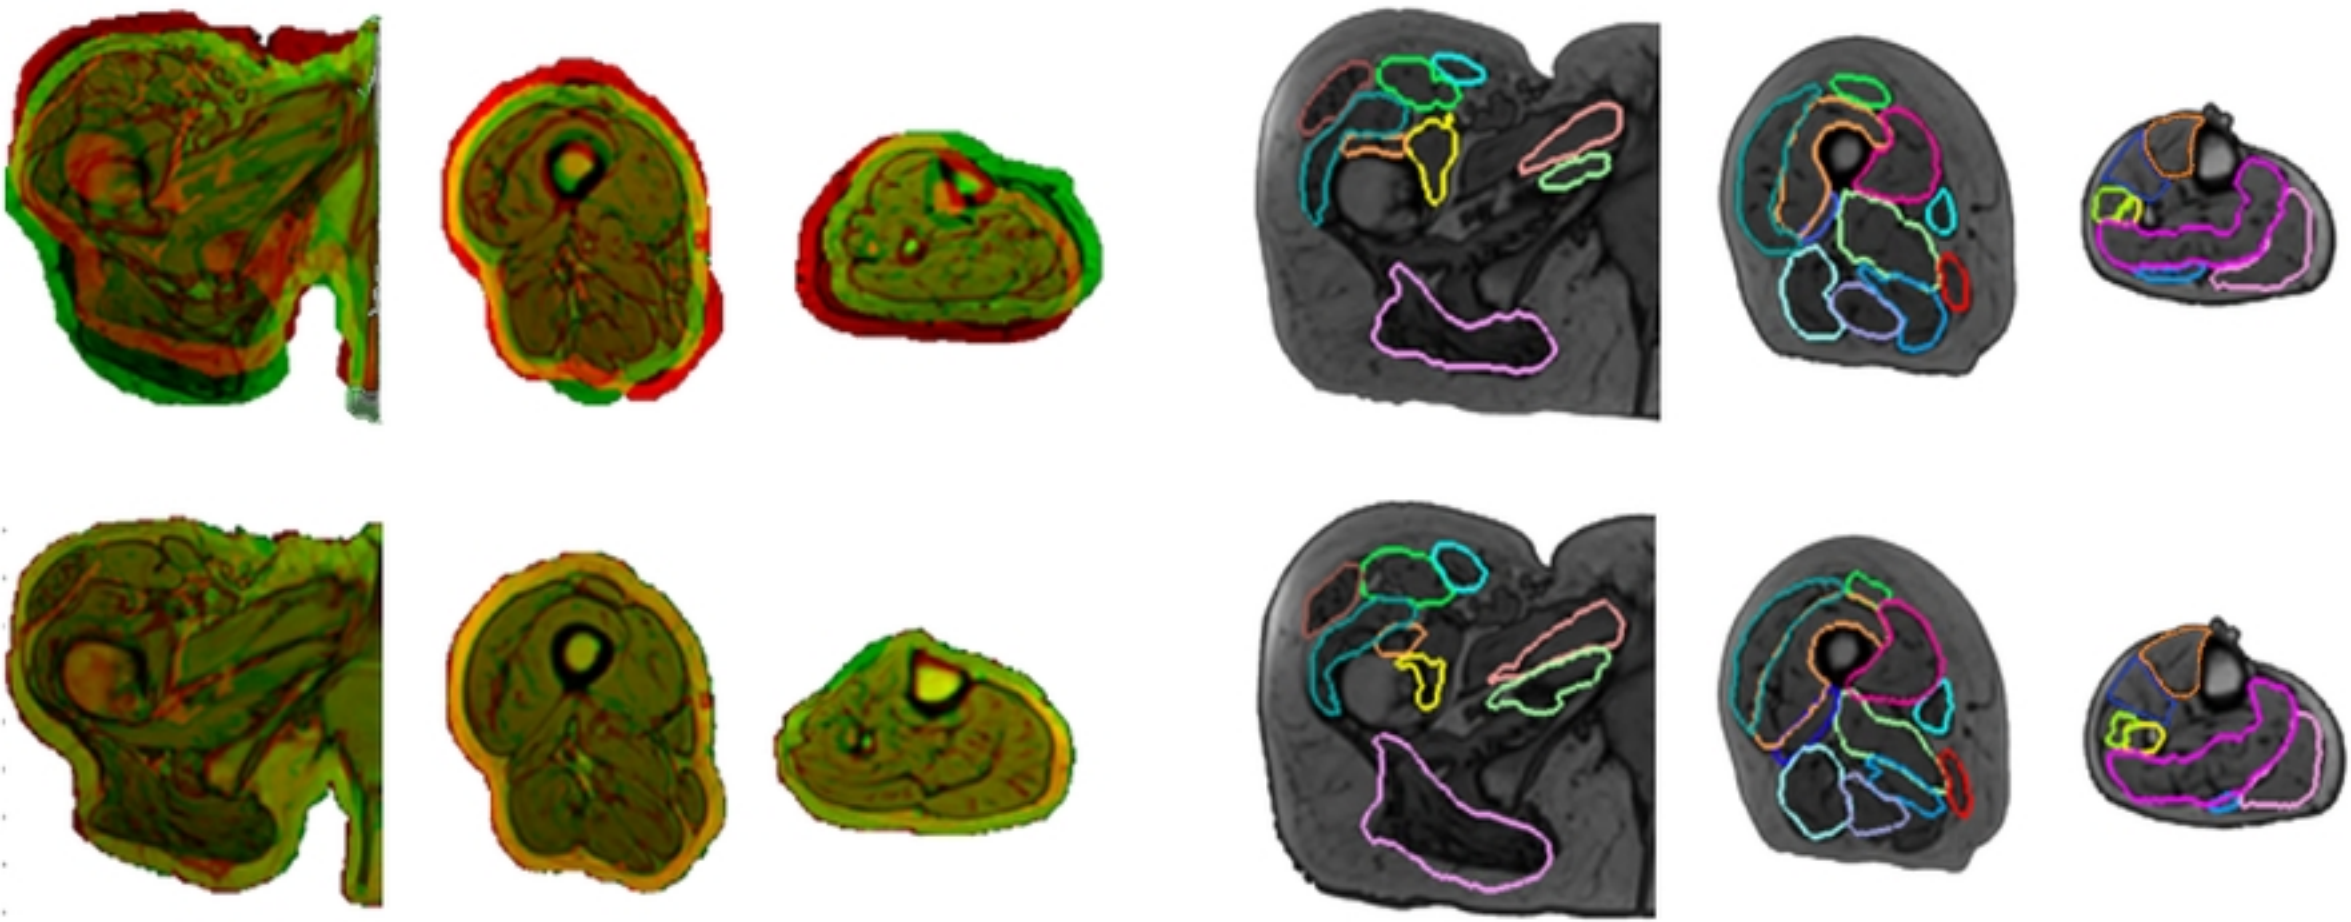

Figure 4
